# Supplementary material for: Sepsis and Critical Illness Research Center investigators: protocols and standard operating procedures for a prospective cohort study of sepsis in critically ill surgical patients
Source: PubMed Central journal article supplement — BMJ Open. 2017 Aug 1;7(7):e015136. doi: 10.1136/bmjopen-2016-015136 (PMC5642775; doi:10.1136/bmjopen-2016-015136), 2017-08-01

# BMJ Open

BMJ Open is committed to open peer review. As part of this commitment we make the peer review history of every article we publish publicly available.

When an article is published we post the peer reviewers' comments and the authors' responses online. We also post the versions of the paper that were used during peer review. These are the versions that the peer review comments apply to.

The versions of the paper that follow are the versions that were submitted during the peer review process. They are not the versions of record or the final published versions. They should not be cited or distributed as the published version of this manuscript.

BMJ Open is an open access journal and the full, final, typeset and author-corrected version of record of the manuscript is available on our site with no access controls, subscription charges or pay-per-view fees (<http://bmjopen.bmj.com>).

If you have any questions on BMJ Open's open peer review process please email [editorial.bmjopen@bmj.com](mailto:editorial.bmjopen@bmj.com)

# BMJ Open

## Sepsis and Critical Illness Research Center Investigators: standard operating procedures for a prospective cohort study of sepsis in critically ill surgical patients

|                                 |                                                                                                                                                                                                                                                                                                                                                                                                                                                                                                                                                                                                                                              |
|---------------------------------|----------------------------------------------------------------------------------------------------------------------------------------------------------------------------------------------------------------------------------------------------------------------------------------------------------------------------------------------------------------------------------------------------------------------------------------------------------------------------------------------------------------------------------------------------------------------------------------------------------------------------------------------|
| Journal:                        | <i>BMJ Open</i>                                                                                                                                                                                                                                                                                                                                                                                                                                                                                                                                                                                                                              |
| Manuscript ID                   | bmjopen-2016-015136                                                                                                                                                                                                                                                                                                                                                                                                                                                                                                                                                                                                                          |
| Article Type:                   | Protocol                                                                                                                                                                                                                                                                                                                                                                                                                                                                                                                                                                                                                                     |
| Date Submitted by the Author:   | 10-Nov-2016                                                                                                                                                                                                                                                                                                                                                                                                                                                                                                                                                                                                                                  |
| Complete List of Authors:       | Loftus, Tyler; Department of Surgery<br>Mira, Juan; Department of Surgery<br>Ozrazgat-Baslanti, Tezcan; Department of Anesthesiology<br>Stortz, Julie; Department of Surgery<br>Brumback, Babette ; Department of Biostatistics<br>Bihorac, Azra; Department of Anesthesiology<br>Segal, Mark; Department of Medicine<br>Anton, Stephen; Institute on Aging<br>Leeuwenburgh, Christiaan; Institute on Aging<br>Mohr, Alicia; Department of Surgery<br>Efron, Philip; Department of Surgery<br>Moldawer, Lyle; Department of Surgery<br>Moore, Frederick; Department of Surgery<br>Brakenridge, Scott; University of Florida, General Surgery |
| <b>Primary Subject Heading</b>: | Intensive care                                                                                                                                                                                                                                                                                                                                                                                                                                                                                                                                                                                                                               |
| Secondary Subject Heading:      | Epidemiology, Evidence based practice, Health informatics, Research methods, Surgery                                                                                                                                                                                                                                                                                                                                                                                                                                                                                                                                                         |
| Keywords:                       | Immunology < BASIC SCIENCES, Health informatics < BIOTECHNOLOGY & BIOINFORMATICS, Adult intensive & critical care < INTENSIVE & CRITICAL CARE, Adult surgery < SURGERY, Protocols & guidelines < HEALTH SERVICES ADMINISTRATION & MANAGEMENT, CLINICAL PHYSIOLOGY                                                                                                                                                                                                                                                                                                                                                                            |
|                                 |                                                                                                                                                                                                                                                                                                                                                                                                                                                                                                                                                                                                                                              |

SCHOLARONE™  
Manuscripts

**Sepsis and Critical Illness Research Center Investigators: standard operating procedures  
for a prospective cohort study of sepsis in critically ill surgical patients**

Short title: SCIRC standard operating procedures

Tyler J. Loftus, MD<sup>a,b</sup> ([Tyler.Loftus@surgery.ufl.edu](mailto:Tyler.Loftus@surgery.ufl.edu))

Juan C. Mira, MD<sup>a,b</sup> ([Juan.Mira@surgery.ufl.edu](mailto:Juan.Mira@surgery.ufl.edu))

Tezcan Ozrazgat-Baslanti, PhD<sup>a,c</sup> ([Tezcan.OzrazgatBaslanti@medicine.ufl.edu](mailto:Tezcan.OzrazgatBaslanti@medicine.ufl.edu))

Julie A. Stortz, MD<sup>a,b</sup> ([Julie.Stortz@surgery.ufl.edu](mailto:Julie.Stortz@surgery.ufl.edu))

Babette A. Brumback, PhD<sup>a,d</sup> ([brumback@PHHP.ufl.edu](mailto:brumback@PHHP.ufl.edu))

Azra Bihorac, MD<sup>a,c</sup> ([abihorac@anest.ufl.edu](mailto:abihorac@anest.ufl.edu))

Mark S. Segal, MD, PhD<sup>a,e</sup> ([Mark.Segal@medicine.ufl.edu](mailto:Mark.Segal@medicine.ufl.edu))

Stephen D. Anton, PhD<sup>a,f</sup> ([santon@ufl.edu](mailto:santon@ufl.edu))

Christiaan Leeuwenburgh, PhD<sup>a,f</sup> ([cleeuwen@ufl.edu](mailto:cleeuwen@ufl.edu))

Alicia M. Mohr, MD<sup>a,b</sup> ([Alicia.Mohr@surgery.ufl.edu](mailto:Alicia.Mohr@surgery.ufl.edu))

Philip A. Efron MD<sup>a,b</sup> ([Philip.Efron@surgery.ufl.edu](mailto:Philip.Efron@surgery.ufl.edu))

Lyle L. Moldawer, PhD<sup>a,b</sup> ([Lyle.Moldawer@surgery.ufl.edu](mailto:Lyle.Moldawer@surgery.ufl.edu))

Frederick A. Moore MD<sup>a,b</sup> ([Frederick.Moore@surgery.ufl.edu](mailto:Frederick.Moore@surgery.ufl.edu))

Scott C. Brakenridge, MD, MSCS<sup>a,b</sup> ([Scott.Brakenridge@surgery.ufl.edu](mailto:Scott.Brakenridge@surgery.ufl.edu))

<sup>a</sup>University of Florida Health, Department of Surgery and Sepsis and Critical Illness Research Center in Gainesville, Florida

<sup>b</sup>University of Florida Health, Department of Surgery

<sup>c</sup>University of Florida Health, Department of Anesthesiology

<sup>d</sup>University of Florida Health, Department of Biostatistics

<sup>e</sup>University of Florida Health, Department of Medicine

<sup>f</sup>University of Florida Health, Institute on Aging

Please address correspondence to:

Scott C. Brakenridge MD, MSCS

University of Florida Health, Gainesville, FL

1600 SW Archer Road Room M-602

Gainesville, FL, 32610-3003

972-415-2447

[Scott.Brakenridge@surgery.ufl.edu](mailto:Scott.Brakenridge@surgery.ufl.edu)

The authors have no relevant conflicts of interest. The authors were supported by P50 GM111152–01 awarded by the National Institute of General Medical Sciences (NIGMS). TJL was supported by a post-graduate training grant (T32 GM-08721) in burns, trauma and perioperative injury from the NIGMS.

## Abstract

**Introduction:** Sepsis is a common, costly, and morbid cause of critical illness in trauma and surgical patients. Ongoing advances in sepsis resuscitation and critical care support strategies have led to improved in-hospital mortality. However, these patients now survive to a enter state of chronic critical illness (CCI), persistent low-grade organ dysfunction, and poor long-term outcomes driven by the persistent inflammation, immunosuppression, and catabolism syndrome (PICS). The Sepsis and Critical Illness Research Center (SCIRC) was created to provide a platform by which the prevalence and pathogenesis of CCI and PICS may be understood at a mechanistic level across multiple medical disciplines, leading to the development of novel management strategies and targeted therapies.

**Methods:** Here we describe the design, study cohort, and standard operating procedures used in the prospective study of human sepsis at a level 1 trauma center and tertiary care hospital providing care for over 2,600 critically ill patients annually. These procedures include implementation of an automated sepsis surveillance initiative, augmentation of clinical decisions with a computerized sepsis protocol, strategies for direct exportation of quality-filtered data from the electronic medical record to a research database, and robust long-term follow-up.

**Ethics and dissemination:** This study has been registered at Clinicaltrials.gov and is actively enrolling subjects. Dissemination of preliminary results is forthcoming.

### Strengths and limitations of this study

- Computerized decision support will minimize the influence of variability in management practices
- Robust long-term follow-up will allow for deeper understanding of functional recovery following sepsis
- Investigation of targeted therapies is currently limited by deficiencies our understanding of sepsis pathophysiology

## Introduction

Sepsis as both a cause and complication of surgical intensive care unit admission is common, costly, and morbid. Hospitalization with sepsis has become more common than hospitalization with myocardial infarction, with annual costs over \$20 billion in the United States<sup>1,2</sup>. Mortality rates for sepsis range from 18-28%, and remain unacceptably high despite more than 30 years of intensive research<sup>3,4</sup>. Recent advances in resuscitation strategies have improved in-hospital mortality, but sepsis survivors often enter a state of chronic critical illness (CCI) driven by the persistent inflammation, immunosuppression, and catabolism syndrome (PICS)<sup>5,6</sup> (Figure 1). However, the pathophysiology of these conditions remains incompletely understood. The Sepsis and Critical Illness Research Center (SCIRC) was created to provide a platform by which the prevalence and pathogenesis of PICS may be understood at a mechanistic level across multiple medical disciplines, leading to the development of novel management strategies and targeted therapies.

## Methods and analysis

### Setting

The University of Florida Health Shands Hospital (Gainesville, Florida; U.S.A.) is a Level 1 Trauma and tertiary care center with two trauma/surgical intensive care units (ICU) totaling 48 beds, which serve as the recruitment base for this cohort study. UF Health is the sole tertiary care center for a greater than 90-mile radius catchment area, including over 1.5 million

1  
2  
3 people. Together, the trauma and surgical ICU teams manage over 2,600 critically ill patients  
4  
5 annually. Each ICU has a dedicated surgical critical care team including a board certified  
6  
7 attending intensivist, critical care fellows, surgical and anesthesia residents, and advanced  
8  
9 practice providers (physician assistants and nurse practitioners). These teams collaborate with  
10  
11 unit-dedicated pharmacists, respiratory therapists, physical therapists, occupational therapists,  
12  
13 nutritionists, and social workers. Board certified attending acute care surgeons and critical care  
14  
15 fellows provide in-hospital coverage 24 hours per day, 7 days per week.  
16  
17  
18  
19  
20  
21  
22  
23

#### 24 Study design and population

25  
26  
27 This is a prospective, longitudinal cohort study of surgical intensive care unit (ICU)  
28  
29 patients that develop surgical sepsis. Based on preliminary data and *a priori* power analyses,  
30  
31 400 patients will be enrolled over a period of 4 years, with subsequent 12-month individual  
32  
33 follow-up. Inclusion criteria are presence in the trauma/surgical intensive care unit, age  $\geq 18$   
34  
35 years, and diagnosis with sepsis, severe sepsis or septic shock with subsequent initiation of the  
36  
37 computerized clinical decision support (CCDS) directed sepsis protocol <sup>7,8</sup>. Septic patients are  
38  
39 initially identified by a modified version of the Modified Early Warning Score (MEWS-SRS) <sup>9</sup>,  
40  
41 which screens for sepsis based on temperature, heart rate, respiratory rate, blood pressure, and  
42  
43 level of consciousness (Figure 2). In the emergency department and on surgical wards, this score  
44  
45 is calculated for each patient on arrival, every time vital signs are recorded, and any time a  
46  
47 patient has an acute change from their baseline physiologic status, prompting further  
48  
49 investigation. Patients identified by the MEWS screening protocol are then directly assessed by  
50  
51 a physician or advance practice provider for bedside clinical adjudication of the presence of  
52  
53  
54  
55  
56  
57  
58  
59  
60

1  
2  
3 sepsis (a systemic inflammatory response with a source of infection), severe sepsis (sepsis-  
4 induced tissue hypoperfusion or organ dysfunction), or septic shock (severe sepsis with  
5  
6 induced tissue hypoperfusion or organ dysfunction), or septic shock (severe sepsis with  
7  
8 persistent arterial hypotension despite volume resuscitation) based on consensus definitions<sup>10-13</sup>.  
9

10 This screening and diagnostic process has been automated and embedded within the UF Health  
11  
12 electronic medical record (Epic Systems, Verona, WI).  
13

14  
15  
16 Exclusion criteria are age <18 years, severe traumatic brain injury (i.e. CT evidence of  
17  
18 neurologic injury and Glasgow Coma Scale score <8), spinal cord injury resulting in permanent  
19  
20 sensory and/or motor deficits, sepsis with an uncontrollable source (e.g. unresectable bowel  
21  
22 ischemia), NY Heart Association class IV heart failure, Child-Pugh Class B or C liver disease,  
23  
24 known HIV infection with CD4 count <200 cells/mm<sup>3</sup>, organ transplant recipient on an  
25  
26 immunosuppressant agent, chemotherapy or radiotherapy within 30 days prior to onset of sepsis,  
27  
28 expected lifespan <3 months due to severe pre-existing comorbidities, active Do Not Resuscitate  
29  
30 or Do Not Intubate order, pregnancy, incarceration, or institutionalization.  
31  
32  
33  
34  
35  
36  
37  
38

### 39 Computerized clinical decision support (CCDS) sepsis protocol

40  
41  
42 Patients who are diagnosed with sepsis, severe sepsis, or septic shock are started on a  
43  
44 computerized clinical decision support protocol, as previously described<sup>7</sup>. This system was  
45  
46 modified from a sepsis management protocol originally implemented at the Methodist Hospital  
47  
48 in Houston, Texas<sup>8</sup>. In brief, mobile bedside computer workstations were programed with  
49  
50 sepsis protocol algorithm logic that interacts with the patient and clinician by mapping clinical  
51  
52 workflow and recommendations to patient physiology and clinical interventions. The sepsis  
53  
54 protocol algorithm logic was developed by a multidisciplinary team of surgeons, intensivists,  
55  
56  
57  
58  
59  
60



1  
2  
3 advanced practitioners, nurses, respiratory therapists, pharmacists, pathologists, and computer  
4  
5 engineers, based on Surviving Sepsis Campaign guidelines<sup>13</sup>. The algorithm produces a  
6  
7 recommendation; the clinician may accept or modify the recommendation, tailoring care to  
8  
9 individual patient-specific factors. The selected intervention is then imputed, and the  
10  
11 computerized clinical workflow and recommendations continue to evolve.  
12  
13

14  
15  
16 The computerized sepsis protocol is the platform for clinical decisions regarding initial  
17  
18 volume resuscitation and antibiotic therapy initiation. For all other clinical decisions, the SCIRC  
19  
20 developed protocols based on standard operating procedures from the Inflammation and the Host  
21  
22 Response to Injury Collaborative Research Program<sup>14-23</sup>. SCIRC protocols include a traumatic  
23  
24 brain injury management protocol, sedation and analgesia protocol, delirium protocol,  
25  
26 mechanical ventilation protocol, ventilator associated pneumonia prevention bundle, blood  
27  
28 product transfusion protocol, nutritional support protocol, stress ulcer prophylaxis protocol,  
29  
30 electrolyte replacement protocol, subcutaneous and continuous infusion insulin protocol, venous  
31  
32 thromboembolism prophylaxis protocol, and progressive upright mobility protocol.  
33  
34  
35  
36  
37  
38

### 39 Subject recruitment

40  
41  
42 When a patient diagnosed with sepsis, a page notification is sent to a team of research  
43  
44 nurses who respond to evaluate for study enrollment 24 hours per day, 7 days per week. The  
45  
46 research nurse on-call evaluates inclusion and exclusion criteria. If the patient qualifies, the  
47  
48 research nurse seeks to obtain informed consent from the patient (if able) or legally authorized  
49  
50 representative. Similar to the Inflammation and Host Response to Injury program, a 96-hour  
51  
52 waiver of informed consent exists for initial sample and data collection based upon previous  
53  
54 precedent at this institution, and approved by the institutional review board (IRB)<sup>14-16</sup>. If  
55  
56  
57  
58  
59  
60

1  
2  
3 consent is not able to be obtained after 96 hours, all initial blood samples and patient data are  
4 destroyed. If consent is initially obtained from the legally authorized representative and the  
5  
6 patient regains decision-making capacity, the patient has the opportunity to withdraw from the  
7  
8 study at that time. Study subjects may choose to participate during hospital admission with or  
9  
10 without long-term follow-up, though long-term follow-up is encouraged, per study objectives.  
11  
12  
13

14  
15  
16 Within the first seven days, all study subjects undergo prospective clinical adjudication to  
17  
18 confirm proper diagnosis, source identification, and severity classification of sepsis during  
19  
20 weekly SCIRC adjudication and retention committee meetings. As this study was designed and  
21  
22 initiated prior to the Sepsis-3 consensus statement, sepsis severity is classified by previously  
23  
24 established consensus definitions<sup>10-13</sup>. However, data collected during the course of the study  
25  
26 will allow for subsequent classification and comparison to the subsequently released Sepsis-3  
27  
28 consensus statement<sup>24</sup>.  
29  
30  
31  
32  
33  
34  
35  
36

### 37 Data procurement and management

38  
39  
40 Data describing baseline characteristics, management, and outcomes for each study  
41  
42 subject are prospectively collected, recorded, and managed using the REDCap<sup>TM</sup> (REDCap  
43  
44 consortium; [www.projectredcap.org](http://www.projectredcap.org)) research electronic case report form platform<sup>25</sup>. In  
45  
46 collaboration with the University of Florida Clinical and Translational Science Institute (CTSI),  
47  
48 our center developed an automated data collection and integration system that extracts clinical  
49  
50 data from the electronic medical record and uploads the data to REDCap over a secure server on  
51  
52 a daily basis. Raw data from the electronic medical record (EMR), including information on  
53  
54 patient laboratory results, vital signs, medications, and information related to hospital and ICU  
55  
56  
57  
58  
59  
60

1  
2  
3 admission and discharge are directly uploaded to the SCIRC database by the University of  
4  
5 Florida Health Integrated Data Repository (IDR). The SCIRC database includes over 800 data  
6  
7 fields describing the vital signs, clinical signs and symptoms of sepsis, medical history,  
8  
9 laboratory values, microbiologic analyses, cardiopulmonary resuscitation parameters, procedural  
10  
11 interventions, medications, infusions, and outcomes for each patient. Parameters available in the  
12  
13 EMR are transferred to the SCIRC database after compilation and quality filtering via the IDR  
14  
15 system. Data from biologic sampling analyses performed by the Bioanalytical Core (e.g. flow  
16  
17 cytometry, ELISA, multiplex, and gene analyses) are also transferred to the SCIRC drive as they  
18  
19 are completed. The SCIRC database gives each project access to its own protected folder and to  
20  
21 a bridge folder in which data can be placed for transfer to the Database Management and  
22  
23 Biostatistics Core personnel for quality control and statistical analyses. The quality and accuracy  
24  
25 of the transferred data is validated at regular intervals by the Database Management and  
26  
27 Biostatistics Core. Parameters that are not available in the electronic medical record are  
28  
29 manually extracted and entered into the REDCap case report form platform. Data regarding the  
30  
31 inpatient hospital course prior to protocol initiation are also collected. For patients transferred  
32  
33 from another facility, this includes records from the outside facility regarding the initial signs  
34  
35 and symptoms of sepsis, microbiologic findings, antibiotic administration parameters, and source  
36  
37 control procedures.  
38  
39  
40  
41  
42  
43  
44  
45  
46  
47  
48  
49

#### 50 Biomarker sampling, processing, and analysis

51  
52

53 Tissue samples are collected at scheduled intervals for biomarkers analyses of  
54  
55 inflammation (e.g. plasma tumor necrosis factor-alpha, interleukin (IL)-1, IL-2, IL-3, IL-5, IL-6,  
56  
57  
58  
59  
60

1  
2  
3 IL-10, IL-12, interferon-gamma, macrophage inflammatory protein 1-alpha),  
4  
5 immunosuppression (e.g. granulocytic and monocytic myeloid-derived suppressor cells in whole  
6  
7 blood) and catabolism (e.g. serum prealbumin, urine 3-methylhistidine, skeletal muscle high-  
8  
9 resolution respirometry *in situ*) from 12 hours out to 42 days or inpatient discharge. For  
10  
11 purposes of sample collection, time zero coincides with initiation of the sepsis protocol. Blood  
12  
13 samples and laboratory measurements are obtained at the following time points, relative to sepsis  
14  
15 protocol and study initiation: 12 hours, 1 day, 4 days, 7 days, 14 days, 21 days, 28 days, 35 days,  
16  
17 and 42 days. Initial sample processing, including centrifugation, labeling, and freezing of  
18  
19 patient samples, is performed 24 hours per day, 7 days per week at an on-site sample processing  
20  
21 laboratory located within the trauma ICU. All samples are subsequently transported to the  
22  
23 Bioanalytics core or individual project laboratories as appropriate. Analytic methods include  
24  
25 flow cytometry, enzyme-linked immunosorbent assay, multiplex, and gene expression array  
26  
27 (NanoString Technologies, Seattle, WA, and Affymetrix, Cleveland, OH). The analytic plan  
28  
29 followed the STROBE recommendations for observational cohort studies<sup>26</sup>.  
30  
31  
32  
33  
34  
35  
36  
37  
38  
39  
40

#### 41 Subject retention, clinical assessments, and long-term follow-up

42  
43  
44 During the index hospitalization, clinical assessments focus on host factors (e.g. age,  
45  
46 gender, comorbidities, hospital course prior to ICU admission), infection characteristics (e.g.  
47  
48 presumed type of infection, microbiologic data, antibiotic therapy), sepsis severity (e.g.  
49  
50 hemodynamic parameters, vasopressor support, laboratory measures of hypoxemia and tissue  
51  
52 ischemia, Sequential Organ Failure Assessment (SOFA) scores<sup>27</sup>, APACHE II scores<sup>28</sup>),  
53  
54 volume status by protocolized bedside echocardiography, procedural interventions to obtain  
55  
56  
57  
58  
59  
60

1  
2  
3 source control, nutritional parameters (e.g. caloric and protein goals, nitrogen balance, metabolic  
4 cart for energy expenditure), and short-term outcomes (e.g. infectious complications, non-  
5 infectious complications, ICU length of stay, days on mechanical ventilation, change in SOFA  
6 score over time, in-hospital mortality, discharge disposition).  
7  
8  
9  
10  
11

12  
13  
14 A retention committee creates an individualized follow-up plan for each study subject  
15 prior to discharge from the hospital. The retention committee meets twice per week to discuss  
16 all active study subjects, with special attention to subjects for whom long-term follow-up may be  
17 jeopardized by geographic and social impediments. Phone contact encounters are scheduled and  
18 used to predict retention problems. Parking and transportation costs are provided to the study  
19 subjects to maximize access to the research center. Members of the retention committee are  
20 trained to recognize and address psychosocial issues and provide emotional support as needed.  
21 When medical and/or mental health problems necessitating further treatment are identified, the  
22 retention committee provides referrals to the appropriate specialists, and ensures that care is  
23 provided in a timely fashion.  
24  
25  
26  
27  
28  
29  
30  
31  
32  
33  
34  
35  
36  
37

38 Long-term follow-up outpatient clinic visits occur at 3 months, 6 months, and 12 months  
39 at the facilities of the University of Florida Institute on Aging. Clinical assessments at these time  
40 points will focus on functional recovery from sepsis by performing a battery of tests including  
41 the Rand 36 Item SF health Survey<sup>29</sup>, Mini Nutritional Assessment<sup>30</sup>, EQ-5D-3L Health  
42 Questionnaire<sup>31</sup>, Hopkins Verbal Learning Test<sup>32</sup>, Controlled Oral Word Association test<sup>33</sup>,  
43 Modified Mini-Mental State Exam<sup>34</sup>, ECOG/WHO/Zubrod score<sup>35</sup>, Short Physical Performance  
44 Battery<sup>36</sup>, hand grip strength measurement, and body composition measurements with the BIA  
45 450 bioimpedance analyzer (Biodynamics Corporation, Shoreline, WA). If patients are  
46  
47  
48  
49  
50  
51  
52  
53  
54  
55  
56  
57  
58  
59  
60

1  
2  
3 unwilling or unable to return for outpatient clinical follow-up, home-visits are scheduled (up to  
4  
5 2-hour drive radius), or subjective data is collected via telephone interview.  
6  
7

8  
9 To identify and evaluate the progression of sarcopenia, we will perform computed  
10  
11 tomography (CT) morphometric assessments of psoas and abdominal wall lean muscle mass at  
12  
13 baseline, 3 months, and 12 months, using SliceOmatic software (version 5.0 rev 6a; Tomovision,  
14  
15 Magog, Quebec, Canada). Standard of care CT scans of the abdomen and pelvis conducted for  
16  
17 diagnostic purposes while the patient was hospitalized were used for this analysis. Two of these  
18  
19 CT scans were used: the baseline scan was performed within three days of sepsis protocol onset;  
20  
21 the second scan was performed within seven to fourteen days of the baseline scan. To calculate  
22  
23 the total skeletal muscle cross-sectional area (cm<sup>2</sup>), trained investigators identified and quantified  
24  
25 all skeletal muscles (psoas, paraspinal, and abdominal wall muscles) at the level of the third  
26  
27 lumbar (L3) vertebra where both transverse processes were visualized using established  
28  
29 Hounsfield unit (-29 to 150) attenuation thresholds for skeletal muscle tissue<sup>37</sup>. The L3  
30  
31 vertebral level was chosen because skeletal muscle visualized at this axial plane has been shown  
32  
33 to correlate with whole-body muscle mass<sup>38</sup>. Skeletal muscle index (SMI, cm<sup>2</sup>/m<sup>2</sup>) was then  
34  
35 calculated by normalizing the total skeletal muscle cross-sectional area (cm<sup>2</sup>) to patient height  
36  
37 squared (m<sup>2</sup>). Psoas muscle index (PMI, cm<sup>2</sup>/m<sup>2</sup>) was also calculated by normalizing only the  
38  
39 psoas muscle cross-sectional area (cm<sup>2</sup>) to patient height squared (m<sup>2</sup>).  
40  
41  
42  
43  
44  
45  
46  
47  
48  
49  
50

#### 51 Outcome definitions and analytic design

52

53  
54 The primary outcomes of interest are the development of chronic critical illness (CCI)  
55  
56 and 1-year mortality rates after the development of sepsis. CCI is defined as an extended course  
57  
58  
59  
60

1  
2  
3 of critical illness with persistent organ dysfunction requiring intensive care resources. Extended  
4  
5 course of illness requiring intensive care resources is defined as total ICU days >14 days or being  
6  
7 discharged to another hospital, long term acute care hospital, or hospice. Persistent organ  
8  
9 dysfunction is defined as having a SOFA score of at least 2 in any organ system with the  
10  
11 exception of at least 1 for cardiovascular system on day 14 in ICU after protocol onset or last  
12  
13 SOFA score available, whichever comes first. Subjects are deemed to have developed CCI if  
14  
15 they are discharged to dispositions associated with poor outcomes (e.g. long term acute care  
16  
17 facility, skilled nursing facility) prior to ICU day 14 with ongoing evidence of organ dysfunction,  
18  
19 as described above. Mortality at 1-year will be determined by prospective follow-up, or from the  
20  
21 United States Social Security Death Index for those lost to follow-up.  
22  
23  
24  
25  
26  
27

28       Secondary outcomes of interest include changes in health, function and quality of life  
29  
30 assessments at 1-year after sepsis onset. Analyses will include the development of biomarker  
31  
32 and clinical prediction models for the development of CCI, as well as prediction models and the  
33  
34 development of a “CCI score” at ICU day 14 to predict 1-year mortality and poor functional  
35  
36 outcomes. Additionally, biomarker analyses at day 14 will seek to characterize the presence of  
37  
38 persistent inflammation, immunosuppression and catabolism in subjects who have developed  
39  
40 CCI, consistent with the PICS pathophysiologic phenotype.  
41  
42  
43  
44  
45  
46  
47  
48

### 49 **Ethics and dissemination**

50  
51       This study has been registered at Clinicaltrials.gov. The University of Florida IRB  
52  
53 approved this study. All investigators will complete annual training modules regarding the  
54  
55 ethical conduct of research and Health Insurance Portability and Accountability Act (HIPAA)  
56  
57  
58  
59  
60

1  
2  
3 compliance, per IRB requirements. All investigators also complete National Institutes of Health  
4  
5 conflict of interest disclosure training. Results will be presented at national and international  
6  
7 conferences and reported in peer-reviewed journals. Dissemination of preliminary results is  
8  
9 forthcoming.  
10  
11

## 12 13 14 15 16 17 **Summary**

18  
19  
20 Better strategies are needed to improve care for millions of critically ill patients with  
21  
22 sepsis and septic shock. While in-hospital mortality has decreased, a new phenotype of CCI  
23  
24 driven by PICS physiology has emerged, and appears to be associated with a substantial burden  
25  
26 of morbidity and late mortality. Therefore, further investigation is needed to elucidate  
27  
28 pathophysiology and identify therapeutic approaches for CCI and PICS. Through prospective  
29  
30 multidisciplinary investigation augmented by automated sepsis surveillance, clinical decision  
31  
32 support with a computerized sepsis protocol, advanced data management strategies, and robust  
33  
34 long-term follow-up, the SCIRC seeks to develop novel management strategies and targeted  
35  
36 therapies for critically ill septic patients.  
37  
38  
39  
40  
41  
42  
43

## 44 **Author contributions**

45  
46  
47 TO, BAB, AB, MSS, SDA, CL, AMM, PAE, LLM, FAM and SCB contributed to study  
48  
49 design. TJL, JCM, and TO contributed to manuscript composition. LLM, FAM, and SCB  
50  
51 provided critical revisions.  
52  
53  
54  
55  
56  
57  
58  
59  
60



## References

1. Yeh RW, Sidney S, Chandra M, et al. Population trends in the incidence and outcomes of acute myocardial infarction. *N Engl J Med* 2010;362(23):2155-65.
2. Torio CM, Andrews RM. National Inpatient Hospital Costs: The Most Expensive Conditions by Payer, 2011: Statistical Brief #160. Healthcare Cost and Utilization Project (HCUP) Statistical Briefs. Rockville (MD), 2006.
3. Angus DC, Linde-Zwirble WT, Lidicker J, et al. Epidemiology of severe sepsis in the United States: analysis of incidence, outcome, and associated costs of care. *Crit Care Med* 2001;29(7):1303-10.
4. Kaukonen KM, Bailey M, Pilcher D, et al. Systemic inflammatory response syndrome criteria in defining severe sepsis. *N Engl J Med* 2015;372(17):1629-38.
5. Gentile LF, Cuenca AG, Efron PA, et al. Persistent inflammation and immunosuppression: a common syndrome and new horizon for surgical intensive care. *J Trauma Acute Care Surg* 2012;72(6):1491-501.
6. Rosenthal MD, Moore FA. Persistent inflammatory, immunosuppressed, catabolic syndrome (PICS): A new phenotype of multiple organ failure. *J Adv Nutr Hum Metab* 2015;1(1).
7. Croft CA, Moore FA, Efron PA, et al. Computer versus paper system for recognition and management of sepsis in surgical intensive care. *J Trauma Acute Care Surg* 2014;76(2):311-7; discussion 18-9.
8. McKinley BA, Moore LJ, Sucher JF, et al. Computer protocol facilitates evidence-based care of sepsis in the surgical intensive care unit. *J Trauma* 2011;70(5):1153-66; discussion 66-7.

- 1  
2  
3  
4 9. Gardner-Thorpe J, Love N, Wrightson J, et al. The value of Modified Early Warning Score  
5  
6 (MEWS) in surgical in-patients: a prospective observational study. *Ann R Coll Surg Engl*  
7  
8 2006;88(6):571-5.  
9
- 10  
11 10. Muckart DJ, Bhagwanjee S. American College of Chest Physicians/Society of Critical Care  
12  
13 Medicine Consensus Conference definitions of the systemic inflammatory response  
14  
15 syndrome and allied disorders in relation to critically injured patients. *Crit Care Med*  
16  
17 1997;25(11):1789-95.  
18
- 19  
20 11. Levy MM, Fink MP, Marshall JC, et al. 2001 SCCM/ESICM/ACCP/ATS/SIS International  
21  
22 Sepsis Definitions Conference. *Crit Care Med* 2003;31(4):1250-6.  
23
- 24  
25 12. Davies MG, Hagen PO. Systemic inflammatory response syndrome. *Br J Surg*  
26  
27 1997;84(7):920-35.  
28
- 29  
30 13. Dellinger RP, Levy MM, Rhodes A, et al. Surviving sepsis campaign: international  
31  
32 guidelines for management of severe sepsis and septic shock: 2012. *Crit Care Med*  
33  
34 2013;41(2):580-637.  
35
- 36  
37 14. Nathens AB, Johnson JL, Minei JP, et al. Inflammation and the Host Response to Injury, a  
38  
39 large-scale collaborative project: Patient-Oriented Research Core--standard operating  
40  
41 procedures for clinical care. I. Guidelines for mechanical ventilation of the trauma  
42  
43 patient. *J Trauma* 2005;59(3):764-9.  
44
- 45  
46 15. Minei JP, Nathens AB, West M, et al. Inflammation and the Host Response to Injury, a  
47  
48 Large-Scale Collaborative Project: patient-oriented research core--standard operating  
49  
50 procedures for clinical care. II. Guidelines for prevention, diagnosis and treatment of  
51  
52 ventilator-associated pneumonia (VAP) in the trauma patient. *J Trauma* 2006;60(5):1106-  
53  
54 13; discussion 13.  
55  
56  
57  
58  
59  
60

- 1  
2  
3  
4  
5  
6  
7  
8  
9  
10  
11  
12  
13  
14  
15  
16  
17  
18  
19  
20  
21  
22  
23  
24  
25  
26  
27  
28  
29  
30  
31  
32  
33  
34  
35  
36  
37  
38  
39  
40  
41  
42  
43  
44  
45  
46  
47  
48  
49  
50  
51  
52  
53  
54  
55  
56  
57  
58  
59  
60
16. Moore FA, McKinley BA, Moore EE, et al. Inflammation and the Host Response to Injury, a large-scale collaborative project: patient-oriented research core--standard operating procedures for clinical care. III. Guidelines for shock resuscitation. *J Trauma* 2006;61(1):82-9.
17. West MA, Shapiro MB, Nathens AB, et al. Inflammation and the host response to injury, a large-scale collaborative project: Patient-oriented research core-standard operating procedures for clinical care. IV. Guidelines for transfusion in the trauma patient. *J Trauma* 2006;61(2):436-9.
18. Shapiro MB, West MA, Nathens AB, et al. V. Guidelines for sedation and analgesia during mechanical ventilation general overview. *J Trauma* 2007;63(4):945-50.
19. Harbrecht BG, Minei JP, Shapiro MB, et al. Inflammation and the host response to injury, a large-scale collaborative project: patient-oriented research core-standard operating procedures for clinical care: VI. Blood glucose control in the critically ill trauma patient. *J Trauma* 2007;63(3):703-8.
20. West MA, Moore EE, Shapiro MB, et al. Inflammation and the host response to injury, a large-scale collaborative project: patient-oriented research core--standard operating procedures for clinical care VII--Guidelines for antibiotic administration in severely injured patients. *J Trauma* 2008;65(6):1511-9.
21. O'Keefe GE, Shelton M, Cuschieri J, et al. Inflammation and the host response to injury, a large-scale collaborative project: patient-oriented research core--standard operating procedures for clinical care VIII--Nutritional support of the trauma patient. *J Trauma* 2008;65(6):1520-8.

- 1  
2  
3  
4  
5  
6  
7  
8  
9  
10  
11  
12  
13  
14  
15  
16  
17  
18  
19  
20  
21  
22  
23  
24  
25  
26  
27  
28  
29  
30  
31  
32  
33  
34  
35  
36  
37  
38  
39  
40  
41  
42  
43  
44  
45  
46  
47  
48  
49  
50  
51  
52  
53  
54  
55  
56  
57  
58  
59  
60
22. Evans HL, Cuschieri J, Moore EE, et al. Inflammation and the host response to injury, a Large-Scale Collaborative Project: patient-oriented research core standard operating procedures for clinical care IX. Definitions for complications of clinical care of critically injured patients. *J Trauma* 2009;67(2):384-8.
  23. Silver GM, Klein MB, Herndon DN, et al. Standard operating procedures for the clinical management of patients enrolled in a prospective study of Inflammation and the Host Response to Thermal Injury. *J Burn Care Res* 2007;28(2):222-30.
  24. Singer M, Deutschman CS, Seymour CW, et al. The Third International Consensus Definitions for Sepsis and Septic Shock (Sepsis-3). *JAMA* 2016;315(8):801-10.
  25. Harris PA, Taylor R, Thielke R, et al. Research electronic data capture (REDCap)--a metadata-driven methodology and workflow process for providing translational research informatics support. *J Biomed Inform* 2009;42(2):377-81.
  26. von Elm E, Altman DG, Egger M, et al. The Strengthening the Reporting of Observational Studies in Epidemiology (STROBE) statement: guidelines for reporting observational studies. *PLoS Med* 2007;4(10):e296.
  27. Jones AE, Trzeciak S, Kline JA. The Sequential Organ Failure Assessment score for predicting outcome in patients with severe sepsis and evidence of hypoperfusion at the time of emergency department presentation. *Crit Care Med* 2009;37(5):1649-54.
  28. Knaus WA, Draper EA, Wagner DP, et al. APACHE II: a severity of disease classification system. *Crit Care Med* 1985;13(10):818-29.
  29. Hays RD, Sherbourne CD, Mazel RM. The RAND 36-Item Health Survey 1.0. *Health Econ* 1993;2(3):217-27.

- 1  
2  
3  
4  
5  
6  
7  
8  
9  
10  
11  
12  
13  
14  
15  
16  
17  
18  
19  
20  
21  
22  
23  
24  
25  
26  
27  
28  
29  
30  
31  
32  
33  
34  
35  
36  
37  
38  
39  
40  
41  
42  
43  
44  
45  
46  
47  
48  
49  
50  
51  
52  
53  
54  
55  
56  
57  
58  
59  
60
30. Kaiser MJ, Bauer JM, Ramsch C, et al. Validation of the Mini Nutritional Assessment short-form (MNA-SF): a practical tool for identification of nutritional status. *J Nutr Health Aging* 2009;13(9):782-8.
31. EuroQol G. EuroQol--a new facility for the measurement of health-related quality of life. *Health Policy* 1990;16(3):199-208.
32. Rasmusson DX, Bylsma FW, Brandt J. Stability of performance on the Hopkins Verbal Learning Test. *Arch Clin Neuropsychol* 1995;10(1):21-6.
33. Lezak MD. *Neuropsychological assessment*. 3rd ed. New York: Oxford University Press, 1995.
34. McDowell I, Kristjansson B, Hill GB, et al. Community screening for dementia: the Mini Mental State Exam (MMSE) and Modified Mini-Mental State Exam (3MS) compared. *J Clin Epidemiol* 1997;50(4):377-83.
35. Oken MM, Creech RH, Tormey DC, et al. Toxicity and response criteria of the Eastern Cooperative Oncology Group. *Am J Clin Oncol* 1982;5(6):649-55.
36. Guralnik JM, Simonsick EM, Ferrucci L, et al. A short physical performance battery assessing lower extremity function: association with self-reported disability and prediction of mortality and nursing home admission. *J Gerontol* 1994;49(2):M85-94.
37. Mitsiopoulos N, Baumgartner RN, Heymsfield SB, et al. Cadaver validation of skeletal muscle measurement by magnetic resonance imaging and computerized tomography. *J Appl Physiol* (1985) 1998;85(1):115-22.
38. Mourtzakis M, Prado CM, Lieffers JR, et al. A practical and precise approach to quantification of body composition in cancer patients using computed tomography images acquired during routine care. *J Appl Physiol Nutr Metab* 2008;33(5):997-1006.

- 1  
2  
3 39. Mira JC, Gentile LF, Mathias BJ, et al. Sepsis Pathophysiology, Chronic Critical Illness, and  
4  
5 Persistent Inflammation-Immunosuppression and Catabolism Syndrome. Crit Care Med  
6  
7  
8 2016.  
9  
10  
11  
12  
13  
14  
15  
16  
17  
18  
19  
20  
21  
22  
23  
24  
25  
26  
27  
28  
29  
30  
31  
32  
33  
34  
35  
36  
37  
38  
39  
40  
41  
42  
43  
44  
45  
46  
47  
48  
49  
50  
51  
52  
53  
54  
55  
56  
57  
58  
59  
60

For peer review only

**Table 1:** The modified early warning signs (MEWS) – sepsis recognition score (SRS) grading scale, adapted from Croft et al.<sup>7</sup> was used as a screening tool to identify patients who may be developing sepsis. The provider is notified if the patient has a total score  $\geq 6$ , 3 points in any single category, worsening mental status, or an increase in fraction of inspired oxygen (FiO<sub>2</sub>).

| Points                     | 3                  | 2                           | 1                        | 0                  | 1                         | 2                                  | 3                                            |
|----------------------------|--------------------|-----------------------------|--------------------------|--------------------|---------------------------|------------------------------------|----------------------------------------------|
| Temp                       | < 32               | < 35                        | < 36                     | 36.0-38.4          | 38.5-38.9                 | 39.0-40.9                          | $\geq 41$                                    |
| HR                         | < 40               | 40-44                       | 45-50                    | 51-100             | 101-110                   | 111-129                            | $\geq 129$                                   |
| RR                         | $\leq 7$           | 8                           | 9                        | 10-14              | 15-20                     | 21-29                              | $\geq 30$                                    |
| SBP                        | $\leq 70$          | 71-80                       | 81-100                   | 101-160            | 161-180                   | 181-199                            | $\geq 200$                                   |
| Mental status <sup>a</sup> | unresponsive       | responds to noxious stimuli | responds to voice or tap | alert, cooperative | mildly agitated, confused | very agitated, requires restraints | extremely agitated, danger to self or others |
| WBC                        | < 1.0 <sup>b</sup> | 1.0-2.9 <sup>b</sup>        | -                        | 3.0-14.9           | 15.0-19.9                 | 20.0-39.9                          | $\geq 40$                                    |

Temp: temperature (°C), HR: heart rate, RR: respiratory rate, SBP: systolic blood pressure (mmHg), WBC: white blood cell count ( $\times 10^9/L$ ). <sup>a</sup>Do not score if the patient is receiving a sedating medication or has a general medical condition affecting mental status (e.g. traumatic brain injury, stroke). <sup>b</sup>Do not score if the patient is receiving oncolytic therapy.

## Figure legend

**Figure 1:** The persistent inflammation, immunosuppression, and catabolism syndrome (PICS), adapted from Rosenthal et al.<sup>6</sup> and Mira et al.<sup>39</sup> MOF: multiple organ failure, SIRS: systemic inflammatory response syndrome, CARS: compensatory anti-inflammatory response syndrome, LTAC: long-term acute care facility.



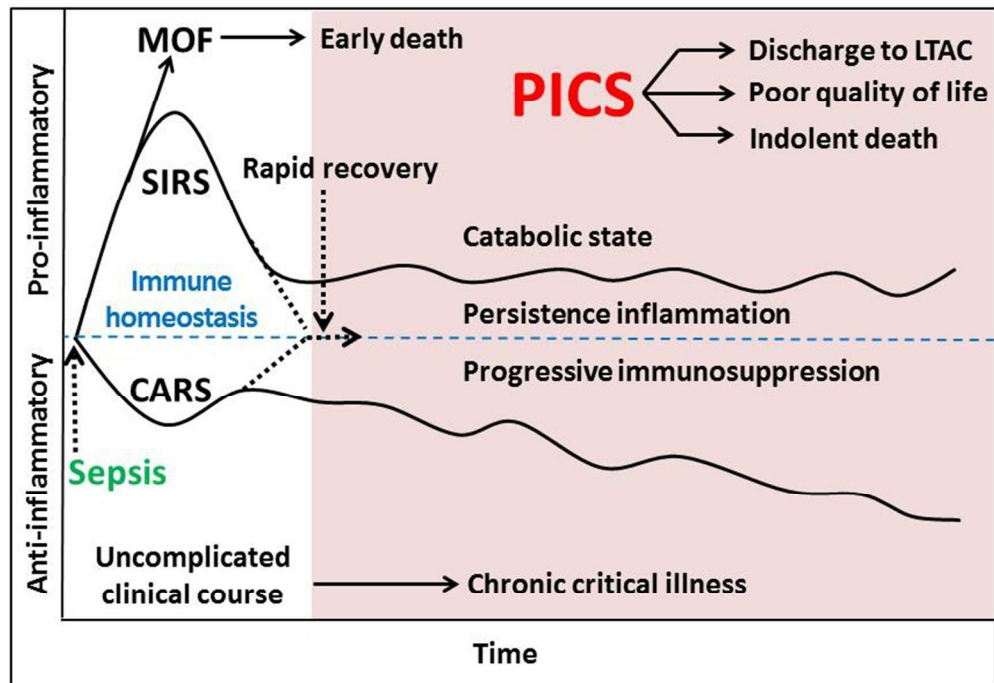

Figure 1: The persistent inflammation, immunosuppression, and catabolism syndrome (PICS), adapted from Rosenthal et al.<sup>6</sup> and Mira et al.<sup>39</sup> MOF: multiple organ failure, SIRS: systemic inflammatory response syndrome, CARS: compensatory anti-inflammatory response syndrome, LTAC: long-term acute care facility.

182x125mm (120 x 120 DPI)

# BMJ Open

## Sepsis and Critical Illness Research Center Investigators: protocols and standard operating procedures for a prospective cohort study of sepsis in critically ill surgical patients

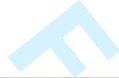

|                                 |                                                                                                                                                                                                                                                                                                                                                                                                                                                                                                                                                                                                                                                                                                                                                                                             |
|---------------------------------|---------------------------------------------------------------------------------------------------------------------------------------------------------------------------------------------------------------------------------------------------------------------------------------------------------------------------------------------------------------------------------------------------------------------------------------------------------------------------------------------------------------------------------------------------------------------------------------------------------------------------------------------------------------------------------------------------------------------------------------------------------------------------------------------|
| Journal:                        | <i>BMJ Open</i>                                                                                                                                                                                                                                                                                                                                                                                                                                                                                                                                                                                                                                                                                                                                                                             |
| Manuscript ID                   | bmjopen-2016-015136.R1                                                                                                                                                                                                                                                                                                                                                                                                                                                                                                                                                                                                                                                                                                                                                                      |
| Article Type:                   | Protocol                                                                                                                                                                                                                                                                                                                                                                                                                                                                                                                                                                                                                                                                                                                                                                                    |
| Date Submitted by the Author:   | 12-May-2017                                                                                                                                                                                                                                                                                                                                                                                                                                                                                                                                                                                                                                                                                                                                                                                 |
| Complete List of Authors:       | Loftus, Tyler; Department of Surgery<br>Mira, Juan; Department of Surgery<br>Ozrazgat-Baslanti, Tezcan; Department of Anesthesiology<br>Ghita, Gabriella; University of Florida, Department of Biostatistics<br>Wang , Zhongkai; University of Florida, Department of Biostatistics<br>Stortz, Julie; Department of Surgery<br>Brumback, Babette ; Department of Biostatistics<br>Bihorac, Azra; Department of Anesthesiology<br>Segal, Mark; Department of Medicine<br>Anton, Stephen; Institute on Aging<br>Leeuwenburgh, Christiaan; Institute on Aging<br>Mohr, Alicia; Department of Surgery<br>Efron, Philip; Department of Surgery<br>Moldawer, Lyle; Department of Surgery<br>Moore, Frederick; Department of Surgery<br>Brakenridge, Scott; University of Florida, General Surgery |
| <b>Primary Subject Heading</b>: | Intensive care                                                                                                                                                                                                                                                                                                                                                                                                                                                                                                                                                                                                                                                                                                                                                                              |
| Secondary Subject Heading:      | Epidemiology, Evidence based practice, Health informatics, Research methods, Surgery                                                                                                                                                                                                                                                                                                                                                                                                                                                                                                                                                                                                                                                                                                        |
| Keywords:                       | Immunology < BASIC SCIENCES, Health informatics < BIOTECHNOLOGY & BIOINFORMATICS, Adult intensive & critical care < INTENSIVE & CRITICAL CARE, Adult surgery < SURGERY, Protocols & guidelines < HEALTH SERVICES ADMINISTRATION & MANAGEMENT, CLINICAL PHYSIOLOGY                                                                                                                                                                                                                                                                                                                                                                                                                                                                                                                           |
|                                 |                                                                                                                                                                                                                                                                                                                                                                                                                                                                                                                                                                                                                                                                                                                                                                                             |

SCHOLARONE™  
Manuscripts

**Sepsis and Critical Illness Research Center Investigators: protocols and standard operating procedures for a prospective cohort study of sepsis in critically ill surgical patients**

Short title: SCIRC standard operating procedures

Tyler J. Loftus, MD<sup>a,b</sup> ([Tyler.Loftus@surgery.ufl.edu](mailto:Tyler.Loftus@surgery.ufl.edu))

Juan C. Mira, MD<sup>a,b</sup> ([Juan.Mira@surgery.ufl.edu](mailto:Juan.Mira@surgery.ufl.edu))

Tezcan Ozrazgat-Baslanti, PhD<sup>a,c</sup> ([Tezcan.OzrazgatBaslanti@medicine.ufl.edu](mailto:Tezcan.OzrazgatBaslanti@medicine.ufl.edu))

Gabriella L. Ghita, MPH<sup>d</sup> ([glghita0429@ufl.edu](mailto:glghita0429@ufl.edu))

Zhongkai Wang MS<sup>d</sup> ([zkwang@ufl.edu](mailto:zkwang@ufl.edu))

Julie A. Stortz, MD<sup>a,b</sup> ([Julie.Stortz@surgery.ufl.edu](mailto:Julie.Stortz@surgery.ufl.edu))

Babette A. Brumback, PhD<sup>a,d</sup> ([brumback@PHHP.ufl.edu](mailto:brumback@PHHP.ufl.edu))

Azra Bihorac, MD<sup>a,c</sup> ([abihorac@anest.ufl.edu](mailto:abihorac@anest.ufl.edu))

Mark S. Segal, MD, PhD<sup>a,c</sup> ([Mark.Segal@medicine.ufl.edu](mailto:Mark.Segal@medicine.ufl.edu))

Stephen D. Anton, PhD<sup>a,f</sup> ([santon@ufl.edu](mailto:santon@ufl.edu))

Christiaan Leeuwenburgh, PhD<sup>a,f</sup> ([cleeuwen@ufl.edu](mailto:cleeuwen@ufl.edu))

Alicia M. Mohr, MD<sup>a,b</sup> ([Alicia.Mohr@surgery.ufl.edu](mailto:Alicia.Mohr@surgery.ufl.edu))

Philip A. Efron MD<sup>a,b</sup> ([Philip.Efron@surgery.ufl.edu](mailto:Philip.Efron@surgery.ufl.edu))

Lyle L. Moldawer, PhD<sup>a,b</sup> ([Lyle.Moldawer@surgery.ufl.edu](mailto:Lyle.Moldawer@surgery.ufl.edu))

Frederick A. Moore MD<sup>a,b</sup> ([Frederick.Moore@surgery.ufl.edu](mailto:Frederick.Moore@surgery.ufl.edu))

Scott C. Brakenridge, MD, MSCS<sup>a,b</sup> ([Scott.Brakenridge@surgery.ufl.edu](mailto:Scott.Brakenridge@surgery.ufl.edu))

<sup>a</sup>University of Florida Health, Department of Surgery and Sepsis and Critical Illness Research Center in Gainesville, Florida

<sup>b</sup>University of Florida Health, Department of Surgery

<sup>c</sup>University of Florida Health, Department of Anesthesiology

<sup>d</sup>University of Florida Health, Department of Biostatistics

<sup>e</sup>University of Florida Health, Department of Medicine

<sup>f</sup>University of Florida Health, Institute on Aging

Please address correspondence to:

Scott C. Brakenridge MD, MSCS

University of Florida Health, Gainesville, FL

1600 SW Archer Road Room M-602

Gainesville, FL, 32610-3003

972-415-2447

[Scott.Brakenridge@surgery.ufl.edu](mailto:Scott.Brakenridge@surgery.ufl.edu)

This work was supported by P50 GM111152–01 awarded by the National Institute of General Medical Sciences (NIGMS). TJL, JCM, and JAS were supported by a post-graduate training grant (T32 GM-08721) in burns, trauma, and perioperative injury from the NIGMS. The authors have read and understood BMJ policy on declaration of interests and declare that we have no competing interests.

## Abstract

**Introduction:** Sepsis is a common, costly, and morbid cause of critical illness in trauma and surgical patients. Ongoing advances in sepsis resuscitation and critical care support strategies have led to improved in-hospital mortality. However, these patients now survive to enter state of chronic critical illness (CCI), persistent low-grade organ dysfunction, and poor long-term outcomes driven by the persistent inflammation, immunosuppression, and catabolism syndrome (PICS). The Sepsis and Critical Illness Research Center (SCIRC) was created to provide a platform by which the prevalence and pathogenesis of CCI and PICS may be understood at a mechanistic level across multiple medical disciplines, leading to the development of novel management strategies and targeted therapies.

**Methods:** Here we describe the design, study cohort, and standard operating procedures used in the prospective study of human sepsis at a level 1 trauma center and tertiary care hospital providing care for over 2,600 critically ill patients annually. These procedures include implementation of an automated sepsis surveillance initiative, augmentation of clinical decisions with a computerized sepsis protocol, strategies for direct exportation of quality-filtered data from the electronic medical record to a research database, and robust long-term follow-up.

**Ethics and dissemination:** This study has been registered at Clinicaltrials.gov, approved by the University of Florida Institutional Review Board, and is actively enrolling subjects.

Dissemination of results is forthcoming.

### Strengths and limitations of this study

- Computerized decision support will minimize the influence of variability in management practices
- Robust long-term follow-up will allow for deeper understanding of functional recovery following sepsis
- Investigation of targeted therapies is currently limited by deficiencies in our understanding of sepsis pathophysiology

## Introduction

Sepsis as both a cause and complication of surgical intensive care unit admission is common, costly, and morbid. Hospitalization with sepsis has become more common than hospitalization with myocardial infarction, with annual costs over \$20 billion in the United States<sup>1 2</sup>. Mortality rates for sepsis range from 18-28%, and remain unacceptably high despite more than 30 years of intensive research<sup>3 4</sup>. Recent advances in resuscitation strategies have improved in-hospital mortality, but sepsis survivors often enter a state of chronic critical illness (CCI) driven by the persistent inflammation, immunosuppression, and catabolism syndrome (PICS)<sup>5 6</sup> (Figure 1). However, the pathophysiology of these conditions remains incompletely understood. The Sepsis and Critical Illness Research Center (SCIRC) was created to provide a platform to better understand the pathophysiology of PICS. The objective of this prospective cohort study of sepsis in critically ill surgical patients is to understand the prevalence and pathogenesis of PICS at a mechanistic level across multiple medical disciplines, leading to the development of novel management strategies and targeted therapies.

## Methods and analysis

### Setting

The University of Florida Health Shands Hospital (Gainesville, Florida; U.S.A.) is a Level 1 Trauma and tertiary care center with two trauma/surgical intensive care units (ICU) totaling 48 beds, which serve as the recruitment base for this cohort study. UF Health is the sole

1  
2  
3 tertiary care center for a greater than 90-mile radius catchment area, including over 1.5 million  
4  
5 people. Together, the trauma and surgical ICU teams manage over 2,600 critically ill patients  
6  
7 annually. Each ICU has a dedicated surgical critical care team including a board certified  
8  
9 attending intensivist, critical care fellows, surgical and anesthesia residents, and advanced  
10  
11 practice providers (physician assistants and nurse practitioners). These teams collaborate with  
12  
13 unit-dedicated pharmacists, respiratory therapists, physical therapists, occupational therapists,  
14  
15 nutritionists, and social workers. Board certified attending acute care surgeons and critical care  
16  
17 fellows provide in-hospital coverage 24 hours per day, 7 days per week.  
18  
19  
20  
21  
22  
23  
24  
25

### 26 Study design and population

27

28  
29 This is a prospective, longitudinal cohort study of surgical intensive care unit (ICU)  
30  
31 patients that develop sepsis. Based on preliminary data and *a priori* power analyses, 400 patients  
32  
33 will be enrolled over a period of 4 years, with subsequent 12-month individual follow-up.  
34  
35 Enrollment began in January 2015 and will continue through January 2019, and beyond if  
36  
37 funding permits. Inclusion criteria are presence in the trauma/surgical intensive care unit, age  $\geq$   
38  
39 18 years, and diagnosis with sepsis, severe sepsis, or septic shock with subsequent initiation of  
40  
41 the computerized clinical decision support (CCDS) directed sepsis protocol<sup>7-9</sup>. Septic patients  
42  
43 are initially identified by a modified version of the Modified Early Warning Score (MEWS-SRS)  
44  
45<sup>10</sup>, which screens for sepsis based on temperature, heart rate, respiratory rate, blood pressure, and  
46  
47 level of consciousness (Table 1). In the emergency department and on surgical wards, this score  
48  
49 is calculated for each patient on arrival, every time vital signs are recorded, and any time a  
50  
51 patient has an acute change from their baseline physiologic status, prompting further  
52  
53  
54  
55  
56  
57  
58  
59  
60

1  
2  
3 investigation. Patients identified by the MEWS screening protocol are then directly assessed by  
4  
5 a physician or advance practice provider for bedside clinical adjudication of the presence of  
6  
7 sepsis (a systemic inflammatory response with a source of infection), severe sepsis (sepsis-  
8  
9 induced tissue hypoperfusion or organ dysfunction), or septic shock (severe sepsis with  
10  
11 persistent arterial hypotension despite volume resuscitation) based on consensus definitions<sup>11-14</sup>.  
12  
13 This screening and diagnostic process has been automated and embedded within the UF Health  
14  
15 electronic medical record (Epic Systems, Verona, WI). All cases that are deemed to have sepsis,  
16  
17 severe sepsis, or septic shock by the physician or advanced practice provider at the bedside are  
18  
19 then reviewed in detail by a faculty member of the SCIRC to ensure that the diagnosis was  
20  
21 appropriate, and are reviewed again at weekly SCIRC sepsis adjudication meetings for the same  
22  
23 purpose.  
24  
25  
26  
27  
28  
29

30 Exclusion criteria are age <18 years, severe traumatic brain injury (i.e. CT evidence of  
31  
32 neurologic injury and Glasgow Coma Scale score <8), spinal cord injury resulting in permanent  
33  
34 sensory and/or motor deficits, sepsis with an uncontrollable source (e.g. unresectable bowel  
35  
36 ischemia), NY Heart Association class IV heart failure, Child-Pugh Class B or C liver disease,  
37  
38 known HIV infection with CD4 count <200 cells/mm<sup>3</sup>, organ transplant recipient on an  
39  
40 immunosuppressant agent, chemotherapy or radiotherapy within 30 days prior to onset of sepsis,  
41  
42 expected lifespan <3 months due to severe pre-existing comorbidities, active Do Not Resuscitate  
43  
44 or Do Not Intubate order, pregnancy, incarceration, or institutionalization. Demographics,  
45  
46 comorbidities, illness severity, length of stay, and discharge disposition for patients who have  
47  
48 been enrolled in the study are listed in Table 2.  
49  
50  
51  
52  
53  
54

55 Within the study population, cohort analyses will include comparisons between patients  
56  
57 who develop CCI versus patients who experience early recovery from sepsis. Among CCI  
58  
59  
60



1  
2  
3 patients, patients who develop PICS will be compared to patients who do not. In addition,  
4  
5 inflammatory, immunosuppression, and catabolism biomarkers will be measured in age-matched  
6  
7 healthy control for comparison to CCI, non-CCI, and PICS patients.  
8  
9

### 10 11 12 13 14 Computerized clinical decision support (CCDS) sepsis protocol 15

16  
17  
18 Patients who are diagnosed with sepsis, severe sepsis, or septic shock are started on a  
19  
20 computerized clinical decision support protocol, as previously described <sup>7</sup>. This system was  
21  
22 modified from a sepsis management protocol originally implemented at the Methodist Hospital  
23  
24 in Houston, Texas <sup>8</sup>. In brief, mobile bedside computer workstations were programed with  
25  
26 sepsis protocol algorithm logic that interacts with the patient and clinician by mapping clinical  
27  
28 workflow and recommendations to patient physiology and clinical interventions. The sepsis  
29  
30 protocol algorithm logic was developed by a multidisciplinary team of surgeons, intensivists,  
31  
32 advanced practitioners, nurses, respiratory therapists, pharmacists, pathologists, and computer  
33  
34 engineers, based on Surviving Sepsis Campaign guidelines <sup>14</sup>. The algorithm produces a  
35  
36 recommendation; the clinician may accept or modify the recommendation, tailoring care to  
37  
38 individual patient-specific factors. The selected intervention is then imputed, and the  
39  
40 computerized clinical workflow and recommendations continue to evolve.  
41  
42  
43  
44  
45

46  
47 The computerized sepsis protocol is the platform for clinical decisions regarding initial  
48  
49 volume resuscitation and antibiotic therapy initiation. For all other clinical decisions, the SCIRC  
50  
51 developed protocols based on standard operating procedures from the Inflammation and the Host  
52  
53 Response to Injury Collaborative Research Program <sup>15-24</sup>. SCIRC protocols include a daily  
54  
55 spontaneous breathing trial protocol (Supplementary figure 1), delirium protocol (Supplementary  
56  
57  
58  
59  
60

1  
2  
3 table 1)<sup>25 26</sup>, product transfusion protocol (Table 3), and a nutritional support protocol  
4  
5 (Supplementary table 2)<sup>27</sup>.  
6  
7  
8  
9

### 10 Subject recruitment

11  
12  
13 When a patient is diagnosed with sepsis, a page notification is sent to a team of research  
14 nurses who respond to evaluate for study enrollment 24 hours per day, 7 days per week. The  
15 research nurse on-call evaluates inclusion and exclusion criteria. If the patient qualifies, the  
16 research nurse seeks to obtain informed consent from the patient (if able) or legally authorized  
17 representative. Similar to the Inflammation and Host Response to Injury program, a 96-hour  
18 deferral of informed consent exists for initial sample and data collection based upon previous  
19 precedent at this institution, and approved by the institutional review board (IRB)<sup>15-17</sup>. If  
20 consent is not obtained within 96 hours, all initial blood samples and patient data are destroyed.  
21 If consent is initially obtained from the legally authorized representative and the patient regains  
22 decision-making capacity, the patient has the opportunity to withdraw from the study at that  
23 time. Study subjects may choose to participate during hospital admission with or without long-  
24 term follow-up, though long-term follow-up is encouraged, per study objectives.  
25  
26  
27  
28  
29  
30  
31  
32  
33  
34  
35  
36  
37  
38  
39  
40  
41

42 Within the first seven days, all study subjects undergo prospective clinical adjudication to  
43 confirm proper diagnosis, source identification, and severity classification of sepsis during  
44 weekly SCIRC adjudication and retention committee meetings. As this study was designed and  
45 initiated prior to the Sepsis-3 consensus statement, sepsis severity is classified by previously  
46 established consensus definitions<sup>11-14</sup>. However, data collected during the course of the study  
47 will allow for subsequent classification and comparison to the subsequently released Sepsis-3  
48 consensus statement, including assessment of qSOFA scores<sup>28 29</sup>.  
49  
50  
51  
52  
53  
54  
55  
56  
57  
58  
59  
60

## Data procurement and management

Data describing baseline characteristics, management, and outcomes for each study subject are prospectively collected, recorded, and managed using the REDCap<sup>TM</sup> (REDCap consortium; [www.projectredcap.org](http://www.projectredcap.org)) research electronic case report form platform<sup>30</sup>. In collaboration with the University of Florida Clinical and Translational Science Institute (CTSI), our center developed an automated data collection and integration system that extracts clinical data from the electronic medical record and uploads the data to REDCap over a secure server on a daily basis. Raw data from the electronic medical record (EMR), including information on patient laboratory results, vital signs, medications, and information related to hospital and ICU admission and discharge are directly uploaded to the SCIRC database by the University of Florida Health Integrated Data Repository (IDR). The SCIRC database includes over 800 data fields describing the vital signs, clinical signs and symptoms of sepsis, medical history, laboratory values, microbiologic analyses, cardiopulmonary resuscitation parameters, procedural interventions, medications, infusions, and outcomes for each patient. Parameters available in the EMR are transferred to the SCIRC database after compilation and quality filtering via the IDR system. Data from biologic sampling analyses performed by the Bioanalytical Core (e.g. flow cytometry, ELISA, multiplex, and gene analyses) are also transferred to the SCIRC drive as they are completed. The SCIRC database gives each project access to its own protected folder and to a bridge folder in which data can be placed for transfer to the Database Management and Biostatistics Core personnel for quality control and statistical analyses. The quality and accuracy of the transferred data is validated at regular intervals by the Database Management and Biostatistics Core by identifying potential outlier values and reviewing the source data with

1  
2  
3 SCIRC faculty. Parameters that are not available in the electronic medical record are manually  
4 extracted and entered into the REDCap case report form platform. Data regarding the inpatient  
5 hospital course prior to protocol initiation are also collected. For patients transferred from  
6 another facility, this includes records from the outside facility regarding the initial signs and  
7 symptoms of sepsis, microbiologic findings, antibiotic administration parameters, and source  
8 control procedures.  
9  
10  
11  
12  
13  
14  
15  
16  
17  
18  
19  
20  
21

### 22 Biomarker sampling, processing, and analysis

23  
24  
25 Tissue samples are collected at scheduled intervals for biomarkers analyses of  
26 inflammation (e.g. plasma tumor necrosis factor-alpha, interleukin (IL)-1, IL-2, IL-3, IL-5, IL-6,  
27 IL-10, IL-12, interferon-gamma, macrophage inflammatory protein 1-alpha),  
28 immunosuppression (e.g. granulocytic and monocytic myeloid-derived suppressor cells in whole  
29 blood, expression of PD-1<sup>31</sup> and PDL-1 on blood monocytes and CD66b<sup>+</sup> neutrophils) and  
30 catabolism (e.g. serum prealbumin, urine 3-methylhistidine, skeletal muscle high-resolution  
31 respirometry *in situ*, assessment of muscle morphology and myosin/actin ratio by histochemistry,  
32 and measurement of FoxO3A, MuRF1, MAFBx, BNIP, calpains, and 20S proteasome activity)  
33 from 12 hours out to 42 days or inpatient discharge for non- muscle samples. Muscle samples  
34 are obtained 28 days after sepsis protocol initiation. Skeletal muscle samples weighing 150-250  
35 mg are obtained from the vastus lateralis at the midpoint between the patella and the greater  
36 trochanter of the femur by trained practitioners using sterile technique under local anesthesia, as  
37 previously described<sup>32</sup>. A portion is immediately permeabilized for high resolution respiration  
38  
39  
40  
41  
42  
43  
44  
45  
46  
47  
48  
49  
50  
51  
52  
53  
54  
55  
56  
57  
58  
59  
60

1  
2  
3 measurements, a portion is mounted in embedding medium and frozen in isopentane for  
4  
5 histochemical analysis, and the remaining tissue is frozen in liquid nitrogen and stored at -80°C.  
6  
7

8  
9 For purposes of sample collection, time zero coincides with initiation of the sepsis  
10 protocol. Blood samples and laboratory measurements are obtained at the following time points,  
11 relative to sepsis protocol and study initiation: 12 hours, 1 day, 4 days, 7 days, 14 days, 21 days,  
12 28 days, 35 days, and 42 days. Initial sample processing, including centrifugation, labeling, and  
13 freezing of patient samples, is performed 24 hours per day, 7 days per week at an on-site sample  
14 processing laboratory located within the trauma ICU. This laboratory contains a -80° freezer, a  
15 microfuge, a refrigerated centrifuge, and an environmental hood. Flow cytometry is performed  
16 on fresh samples, and all other samples are stored in the -80° freezer, and subsequently  
17 transported to the Bioanalytics core or individual project laboratories as appropriate. Collected  
18 specimens are annotated, labeled, and stored according to best practice guidelines<sup>33</sup>. Stored  
19 samples are maintained in a biobank that will remain available for future testing. Standard  
20 training is provided to all laboratory staff regarding machine calibration, sample processing,  
21 operator safety, and quality control. Serum and plasma samples are collected in a fully filled  
22 collection tube, inverted 5-10 times, and then maintained in a closed tube in vertical position  
23 until centrifugation. Samples are analyzed in parallel with reagents from the same batch by the  
24 same technician. Analytic methods include flow cytometry, enzyme-linked immunosorbent  
25 assay, multiplex, and gene expression array (NanoString Technologies, Seattle, WA, and  
26 Affymetrix, Cleveland, OH). The analytic plan followed the STROBE recommendations for  
27 observational cohort studies<sup>34</sup>.  
28  
29  
30  
31  
32  
33  
34  
35  
36  
37  
38  
39  
40  
41  
42  
43  
44  
45  
46  
47  
48  
49  
50  
51  
52

53  
54  
55  
56  
57 Subject retention, clinical assessments, and long-term follow-up  
58  
59  
60

1  
2  
3  
4  
5  
6  
7  
8  
9  
10  
11  
12  
13  
14  
15  
16  
17  
18  
19  
20  
21  
22  
23  
24  
25  
26  
27  
28  
29  
30  
31  
32  
33  
34  
35  
36  
37  
38  
39  
40  
41  
42  
43  
44  
45  
46  
47  
48  
49  
50  
51  
52  
53  
54  
55  
56  
57  
58  
59  
60

During the index hospitalization, clinical assessments focus on host factors (e.g. age, gender, comorbidities, hospital course prior to ICU admission), infection characteristics (e.g. presumed type of infection, microbiologic data, antibiotic therapy), sepsis severity (e.g. hemodynamic parameters, vasopressor support, laboratory measures of hypoxemia and tissue ischemia, Sequential Organ Failure Assessment (SOFA) scores<sup>35</sup>, APACHE II scores<sup>36</sup>), volume status by protocolized bedside echocardiography, procedural interventions to obtain source control, nutritional parameters (e.g. nutrition provided by gastric, post-pyloric, and parenteral routes, weekly caloric and protein goals versus actual calories and protein administered, 24-hour urine collection to assess nitrogen balance, indirect calorimetry, and changes in body mass index and ideal body weight), and short-term outcomes (e.g. infectious complications, non-infectious complications, ICU length of stay, days on mechanical ventilation, change in SOFA score over time, in-hospital mortality, discharge disposition).

32  
33  
34  
35  
36  
37  
38  
39  
40  
41  
42  
43  
44  
45  
46  
47  
48  
49  
50  
51  
52  
53  
54  
55  
56  
57  
58  
59  
60

Bedside echocardiography is performed by the transesophageal approach for intubated patients with an intact esophagus and stomach, no known or suspected gastroesophageal variceal disease, and low risk for pathologically increased intracranial pressures. Echocardiography is performed by the transthoracic approach for all other patients. Assessments include the presence of pericardial fluid, characterization of the right ventricle size as normal, collapsible, or enlarged, characterization of right and left ventricle contractility as normal, poor, or hyperdynamic, description of the superior vena cava collapsibility index as less than or equal to 36%, quantification of fractional area change (the difference in left ventricular area at end-diastole versus end-systole, divided by end-diastolic area), an interpretation of the findings as representing euvoolemia, hypovolemia, or hypervolemia, and a plan to start, discontinue, increase,

1  
2  
3 or decrease intravenous fluid therapy, vasopressor therapy, and inotrope therapy based on  
4  
5  
6 echocardiography findings.  
7

8  
9 A retention committee creates an individualized follow-up plan for each study subject  
10  
11 prior to discharge from the hospital. The retention committee meets twice per week to discuss  
12  
13 all active study subjects, with special attention to subjects for whom long-term follow-up may be  
14  
15 jeopardized by geographic and social impediments. Phone contact encounters are scheduled and  
16  
17 used to predict retention problems. Parking and transportation costs are provided to the study  
18  
19 subjects to maximize access to the research center. Members of the retention committee are  
20  
21 trained to recognize and address psychosocial issues and provide emotional support as needed.  
22  
23 When medical and/or mental health problems necessitating further treatment are identified, the  
24  
25 retention committee provides referrals to the appropriate specialists, and ensures that care is  
26  
27 provided in a timely fashion.  
28  
29  
30  
31  
32

33 Long-term follow-up outpatient clinic visits occur at 3 months, 6 months, and 12 months  
34  
35 at the facilities of the University of Florida Institute on Aging. Clinical assessments at these time  
36  
37 points will focus on functional recovery from sepsis by performing a battery of tests including  
38  
39 the Rand 36 Item SF health Survey<sup>37</sup>, Mini Nutritional Assessment<sup>38</sup>, EQ-5D-3L Health  
40  
41 Questionnaire<sup>39</sup>, Hopkins Verbal Learning Test<sup>40</sup>, Controlled Oral Word Association test<sup>41</sup>,  
42  
43 Modified Mini-Mental State Exam<sup>42</sup>, ECOG/WHO/Zubrod score<sup>43</sup>, Short Physical Performance  
44  
45 Battery<sup>44</sup>, hand grip strength measurement, and body composition measurements with the BIA  
46  
47 450 bioimpedance analyzer (Biodynamics Corporation, Shoreline, WA). If patients are  
48  
49 unwilling or unable to return for outpatient clinical follow-up, home-visits are scheduled (up to  
50  
51 2-hour drive radius), or subjective data is collected via telephone interview.  
52  
53  
54  
55  
56  
57  
58  
59  
60

1  
2  
3 To identify and evaluate the progression of sarcopenia, we will perform computed  
4 tomography (CT) morphometric assessments of psoas and abdominal wall lean muscle mass at  
5 baseline, 3 months, and 12 months, using SliceOmatic software (version 5.0 rev 6a; Tomovision,  
6 Magog, Quebec, Canada). Standard of care CT scans of the abdomen and pelvis conducted for  
7 diagnostic purposes while the patient was hospitalized were used for this analysis. Two of these  
8 CT scans were used: the baseline scan was performed within three days of sepsis protocol onset;  
9 the second scan was performed within seven to fourteen days of the baseline scan. To calculate  
10 the total skeletal muscle cross-sectional area ( $\text{cm}^2$ ), trained investigators identified and quantified  
11 all skeletal muscles (psoas, paraspinal, and abdominal wall muscles) at the level of the third  
12 lumbar (L3) vertebra where both transverse processes were visualized using established  
13 Hounsfield unit (-29 to 150) attenuation thresholds for skeletal muscle tissue<sup>45</sup>. The L3  
14 vertebral level was chosen because skeletal muscle visualized at this axial plane has been shown  
15 to correlate with whole-body muscle mass<sup>46</sup>. Skeletal muscle index (SMI,  $\text{cm}^2/\text{m}^2$ ) was then  
16 calculated by normalizing the total skeletal muscle cross-sectional area ( $\text{cm}^2$ ) to patient height  
17 squared ( $\text{m}^2$ ). Psoas muscle index (PMI,  $\text{cm}^2/\text{m}^2$ ) was also calculated by normalizing only the  
18 psoas muscle cross-sectional area ( $\text{cm}^2$ ) to patient height squared ( $\text{m}^2$ ).  
19  
20  
21  
22  
23  
24  
25  
26  
27  
28  
29  
30  
31  
32  
33  
34  
35  
36  
37  
38  
39  
40  
41  
42  
43  
44

#### 45 Outcome definitions and analytic design

46  
47  
48 The primary outcomes of interest are the development of chronic critical illness (CCI)  
49 and 1-year mortality rates after the development of sepsis. CCI is defined as an extended course  
50 of critical illness with persistent organ dysfunction requiring intensive care resources. Extended  
51 course of illness requiring intensive care resources is defined as total ICU days >14 days or being  
52  
53  
54  
55  
56  
57  
58  
59  
60



1  
2  
3 discharged to another hospital, long term acute care hospital, or hospice. Persistent organ  
4  
5 dysfunction is defined as having a SOFA score of at least 2 in any organ system with the  
6  
7 exception of at least 1 for cardiovascular system on day 14 in ICU after protocol onset or last  
8  
9 SOFA score available, whichever comes first. Subjects are deemed to have developed CCI if  
10  
11 they are discharged to dispositions associated with poor outcomes (e.g. long term acute care  
12  
13 facility, skilled nursing facility) prior to ICU day 14 with ongoing evidence of organ dysfunction,  
14  
15 as described above. Mortality at 1-year will be determined by prospective follow-up, or from the  
16  
17 United States Social Security Death Index for those lost to follow-up.  
18  
19  
20  
21  
22

23 Secondary outcomes of interest include changes in health, function and quality of life  
24  
25 assessments at 1-year after sepsis onset. Analyses will include the development of biomarker  
26  
27 and clinical prediction models for the development of CCI, as well as prediction models and the  
28  
29 development of a “CCI score” at ICU day 14 to predict 1-year mortality and poor functional  
30  
31 outcomes. Additionally, biomarker analyses at day 14 will seek to characterize the presence of  
32  
33 persistent inflammation, immunosuppression and catabolism in subjects who have developed  
34  
35 CCI, consistent with the PICS pathophysiologic phenotype.  
36  
37  
38  
39  
40  
41  
42  
43

#### 44 **Ethics and dissemination**

45  
46  
47 This study has been registered at Clinicaltrials.gov (NCT02276417). The University of  
48  
49 Florida IRB approved this study. This work was supported by P50 GM111152–01 awarded by  
50  
51 the National Institute of General Medical Sciences (NIGMS). TJL, JCM, and JAS were  
52  
53 supported by a post-graduate training grant (T32 GM-08721) in burns, trauma, and perioperative  
54  
55 injury from the NIGMS. The authors have read and understood BMJ policy on declaration of  
56  
57  
58  
59  
60

1  
2  
3 interests and declare that the authors have no competing interests. All investigators will complete  
4 annual training modules regarding the ethical conduct of research and Health Insurance  
5 Portability and Accountability Act (HIPAA) compliance, per IRB requirements. All  
6  
7  
8 investigators also complete National Institutes of Health conflict of interest disclosure training.  
9  
10  
11 Results will be presented at national and international conferences and reported in peer-reviewed  
12  
13  
14 journals. Dissemination of preliminary results is forthcoming.  
15  
16  
17  
18  
19  
20

## 21 **Summary**

22  
23  
24  
25 Better strategies are needed to improve care for millions of critically ill patients with  
26  
27 sepsis and septic shock. While in-hospital mortality has decreased, a new phenotype of CCI  
28  
29 driven by PICS physiology has emerged, and appears to be associated with a substantial burden  
30  
31 of morbidity and late mortality. Therefore, further investigation is needed to elucidate  
32  
33 pathophysiology and identify therapeutic approaches for CCI and PICS. Through prospective  
34  
35 multidisciplinary investigation augmented by automated sepsis surveillance, clinical decision  
36  
37 support with a computerized sepsis protocol, advanced data management strategies, and robust  
38  
39 long-term follow-up, the SCIRC seeks to develop novel management strategies and targeted  
40  
41  
42 therapies for critically ill septic patients.  
43  
44  
45  
46  
47  
48

## 49 **Author contributions**

50  
51  
52 TO, GG, ZW, BAB, AB, MSS, SDA, CL, AMM, PAE, LLM, FAM and SCB contributed  
53  
54 to study design. TJL, JCM, and TO contributed to manuscript composition. LLM, FAM, and  
55  
56  
57 SCB provided critical revisions.  
58  
59  
60

## References

1. Yeh RW, Sidney S, Chandra M, et al. Population trends in the incidence and outcomes of acute myocardial infarction. *N Engl J Med* 2010;362(23):2155-65.
2. Torio CM, Andrews RM. National Inpatient Hospital Costs: The Most Expensive Conditions by Payer, 2011: Statistical Brief #160. Healthcare Cost and Utilization Project (HCUP) Statistical Briefs. Rockville (MD), 2006.
3. Angus DC, Linde-Zwirble WT, Lidicker J, et al. Epidemiology of severe sepsis in the United States: analysis of incidence, outcome, and associated costs of care. *Crit Care Med* 2001;29(7):1303-10.
4. Kaukonen KM, Bailey M, Pilcher D, et al. Systemic inflammatory response syndrome criteria in defining severe sepsis. *N Engl J Med* 2015;372(17):1629-38.
5. Gentile LF, Cuenca AG, Efron PA, et al. Persistent inflammation and immunosuppression: a common syndrome and new horizon for surgical intensive care. *J Trauma Acute Care Surg* 2012;72(6):1491-501.
6. Rosenthal MD, Moore FA. Persistent inflammatory, immunosuppressed, catabolic syndrome (PICS): A new phenotype of multiple organ failure. *J Adv Nutr Hum Metab* 2015;1(1).
7. Croft CA, Moore FA, Efron PA, et al. Computer versus paper system for recognition and management of sepsis in surgical intensive care. *J Trauma Acute Care Surg* 2014;76(2):311-7; discussion 18-9.
8. McKinley BA, Moore LJ, Sucher JF, et al. Computer protocol facilitates evidence-based care of sepsis in the surgical intensive care unit. *J Trauma* 2011;70(5):1153-66; discussion 66-7.
9. Sucher JF, Moore FA, Todd SR, et al. Computerized clinical decision support: a technology to implement and validate evidence based guidelines. *J Trauma* 2008;64(2):520-37.
10. Gardner-Thorpe J, Love N, Wrightson J, et al. The value of Modified Early Warning Score (MEWS) in surgical in-patients: a prospective observational study. *Ann R Coll Surg Engl* 2006;88(6):571-5.
11. Muckart DJ, Bhagwanjee S. American College of Chest Physicians/Society of Critical Care Medicine Consensus Conference definitions of the systemic inflammatory response syndrome and allied disorders in relation to critically injured patients. *Crit Care Med* 1997;25(11):1789-95.
12. Levy MM, Fink MP, Marshall JC, et al. 2001 SCCM/ESICM/ACCP/ATS/SIS International Sepsis Definitions Conference. *Crit Care Med* 2003;31(4):1250-6.
13. Davies MG, Hagen PO. Systemic inflammatory response syndrome. *Br J Surg* 1997;84(7):920-35.
14. Dellinger RP, Levy MM, Rhodes A, et al. Surviving sepsis campaign: international guidelines for management of severe sepsis and septic shock: 2012. *Crit Care Med* 2013;41(2):580-637.

15. Nathens AB, Johnson JL, Minei JP, et al. Inflammation and the Host Response to Injury, a large-scale collaborative project: Patient-Oriented Research Core--standard operating procedures for clinical care. I. Guidelines for mechanical ventilation of the trauma patient. *J Trauma* 2005;59(3):764-9.
16. Minei JP, Nathens AB, West M, et al. Inflammation and the Host Response to Injury, a Large-Scale Collaborative Project: patient-oriented research core--standard operating procedures for clinical care. II. Guidelines for prevention, diagnosis and treatment of ventilator-associated pneumonia (VAP) in the trauma patient. *J Trauma* 2006;60(5):1106-13; discussion 13.
17. Moore FA, McKinley BA, Moore EE, et al. Inflammation and the Host Response to Injury, a large-scale collaborative project: patient-oriented research core--standard operating procedures for clinical care. III. Guidelines for shock resuscitation. *J Trauma* 2006;61(1):82-9.
18. West MA, Shapiro MB, Nathens AB, et al. Inflammation and the host response to injury, a large-scale collaborative project: Patient-oriented research core-standard operating procedures for clinical care. IV. Guidelines for transfusion in the trauma patient. *J Trauma* 2006;61(2):436-9.
19. Shapiro MB, West MA, Nathens AB, et al. V. Guidelines for sedation and analgesia during mechanical ventilation general overview. *J Trauma* 2007;63(4):945-50.
20. Harbrecht BG, Minei JP, Shapiro MB, et al. Inflammation and the host response to injury, a large-scale collaborative project: patient-oriented research core-standard operating procedures for clinical care: VI. Blood glucose control in the critically ill trauma patient. *J Trauma* 2007;63(3):703-8.
21. West MA, Moore EE, Shapiro MB, et al. Inflammation and the host response to injury, a large-scale collaborative project: patient-oriented research core--standard operating procedures for clinical care VII--Guidelines for antibiotic administration in severely injured patients. *J Trauma* 2008;65(6):1511-9.
22. O'Keefe GE, Shelton M, Cuschieri J, et al. Inflammation and the host response to injury, a large-scale collaborative project: patient-oriented research core--standard operating procedures for clinical care VIII--Nutritional support of the trauma patient. *J Trauma* 2008;65(6):1520-8.
23. Evans HL, Cuschieri J, Moore EE, et al. Inflammation and the host response to injury, a Large-Scale Collaborative Project: patient-oriented research core standard operating procedures for clinical care IX. Definitions for complications of clinical care of critically injured patients. *J Trauma* 2009;67(2):384-8.
24. Silver GM, Klein MB, Herndon DN, et al. Standard operating procedures for the clinical management of patients enrolled in a prospective study of Inflammation and the Host Response to Thermal Injury. *J Burn Care Res* 2007;28(2):222-30.

- 1
- 2
- 3
- 4 25. Ely EW, Margolin R, Francis J, et al. Evaluation of delirium in critically ill patients:  
5 validation of the Confusion Assessment Method for the Intensive Care Unit (CAM-ICU).  
6 Crit Care Med 2001;29(7):1370-9.
- 7
- 8 26. Sessler CN, Gosnell MS, Grap MJ, et al. The Richmond Agitation-Sedation Scale: validity  
9 and reliability in adult intensive care unit patients. Am J Respir Crit Care Med  
10 2002;166(10):1338-44.
- 11
- 12 27. Rahman A, Hasan RM, Agarwala R, et al. Identifying critically-ill patients who will benefit  
13 most from nutritional therapy: Further validation of the "modified NUTRIC" nutritional  
14 risk assessment tool. Clin Nutr 2016;35(1):158-62.
- 15
- 16 28. Singer M, Deutschman CS, Seymour CW, et al. The Third International Consensus  
17 Definitions for Sepsis and Septic Shock (Sepsis-3). JAMA 2016;315(8):801-10.
- 18
- 19 29. Finkelsztain EJ, Jones DS, Ma KC, et al. Comparison of qSOFA and SIRS for predicting  
20 adverse outcomes of patients with suspicion of sepsis outside the intensive care unit. Crit  
21 Care 2017;21(1):73.
- 22
- 23 30. Harris PA, Taylor R, Thielke R, et al. Research electronic data capture (REDCap)--a  
24 metadata-driven methodology and workflow process for providing translational research  
25 informatics support. J Biomed Inform 2009;42(2):377-81.
- 26
- 27 31. Mansur A, Hinz J, Hillebrecht B, et al. Ninety-day survival rate of patients with sepsis relates  
28 to programmed cell death 1 genetic polymorphism rs11568821. J Investig Med  
29 2014;62(3):638-43.
- 30
- 31 32. Anton SD, Manini TM, Milsom VA, et al. Effects of a weight loss plus exercise program on  
32 physical function in overweight, older women: a randomized controlled trial. Clin Interv  
33 Aging 2011;6:141-9.
- 34
- 35 33. 2012 best practices for repositories collection, storage, retrieval, and distribution of  
36 biological materials for research international society for biological and environmental  
37 repositories. Biopreserv Biobank 2012;10(2):79-161.
- 38
- 39 34. von Elm E, Altman DG, Egger M, et al. The Strengthening the Reporting of Observational  
40 Studies in Epidemiology (STROBE) statement: guidelines for reporting observational  
41 studies. PLoS Med 2007;4(10):e296.
- 42
- 43 35. Jones AE, Trzeciak S, Kline JA. The Sequential Organ Failure Assessment score for  
44 predicting outcome in patients with severe sepsis and evidence of hypoperfusion at the  
45 time of emergency department presentation. Crit Care Med 2009;37(5):1649-54.
- 46
- 47 36. Knaus WA, Draper EA, Wagner DP, et al. APACHE II: a severity of disease classification  
48 system. Crit Care Med 1985;13(10):818-29.
- 49
- 50 37. Hays RD, Sherbourne CD, Mazel RM. The RAND 36-Item Health Survey 1.0. Health Econ  
51 1993;2(3):217-27.
- 52
- 53 38. Kaiser MJ, Bauer JM, Ramsch C, et al. Validation of the Mini Nutritional Assessment short-  
54 form (MNA-SF): a practical tool for identification of nutritional status. J Nutr Health  
55 Aging 2009;13(9):782-8.
- 56
- 57
- 58
- 59
- 60

- 1  
2  
3  
4  
5  
6  
7  
8  
9  
10  
11  
12  
13  
14  
15  
16  
17  
18  
19  
20  
21  
22  
23  
24  
25  
26  
27  
28  
29  
30  
31  
32  
33  
34  
35  
36  
37  
38  
39  
40  
41  
42  
43  
44  
45  
46  
47  
48  
49  
50  
51  
52  
53  
54  
55  
56  
57  
58  
59  
60
39. EuroQol G. EuroQol--a new facility for the measurement of health-related quality of life. *Health Policy* 1990;16(3):199-208.
  40. Rasmusson DX, Bylsma FW, Brandt J. Stability of performance on the Hopkins Verbal Learning Test. *Arch Clin Neuropsychol* 1995;10(1):21-6.
  41. Lezak MD. *Neuropsychological assessment*. 3rd ed. New York: Oxford University Press, 1995.
  42. McDowell I, Kristjansson B, Hill GB, et al. Community screening for dementia: the Mini Mental State Exam (MMSE) and Modified Mini-Mental State Exam (3MS) compared. *J Clin Epidemiol* 1997;50(4):377-83.
  43. Oken MM, Creech RH, Tormey DC, et al. Toxicity and response criteria of the Eastern Cooperative Oncology Group. *Am J Clin Oncol* 1982;5(6):649-55.
  44. Guralnik JM, Simonsick EM, Ferrucci L, et al. A short physical performance battery assessing lower extremity function: association with self-reported disability and prediction of mortality and nursing home admission. *J Gerontol* 1994;49(2):M85-94.
  45. Mitsiopoulos N, Baumgartner RN, Heymsfield SB, et al. Cadaver validation of skeletal muscle measurement by magnetic resonance imaging and computerized tomography. *J Appl Physiol* (1985) 1998;85(1):115-22.
  46. Mourtzakis M, Prado CM, Lieffers JR, et al. A practical and precise approach to quantification of body composition in cancer patients using computed tomography images acquired during routine care. *Appl Physiol Nutr Metab* 2008;33(5):997-1006.
  47. Mira JC, Gentile LF, Mathias BJ, et al. Sepsis Pathophysiology, Chronic Critical Illness, and Persistent Inflammation-Immunosuppression and Catabolism Syndrome. *Crit Care Med* 2016.

**Table 1:** The modified early warning signs (MEWS) – sepsis recognition score (SRS) grading scale, adapted from Croft et al.<sup>7</sup> was used as a screening tool to identify patients who may be developing sepsis. The provider is notified if the patient has a total score  $\geq 6$ , 3 points in any single category, worsening mental status, or an increase in fraction of inspired oxygen (FiO<sub>2</sub>).

| Points                     | 3                  | 2                           | 1                        | 0                  | 1                         | 2                                  | 3                                            |
|----------------------------|--------------------|-----------------------------|--------------------------|--------------------|---------------------------|------------------------------------|----------------------------------------------|
| Temp                       | < 32               | < 35                        | < 36                     | 36.0-38.4          | 38.5-38.9                 | 39.0-40.9                          | $\geq 41$                                    |
| HR                         | < 40               | 40-44                       | 45-50                    | 51-100             | 101-110                   | 111-129                            | $\geq 129$                                   |
| RR                         | $\leq 7$           | 8                           | 9                        | 10-14              | 15-20                     | 21-29                              | $\geq 30$                                    |
| SBP                        | $\leq 70$          | 71-80                       | 81-100                   | 101-160            | 161-180                   | 181-199                            | $\geq 200$                                   |
| Mental status <sup>a</sup> | unresponsive       | responds to noxious stimuli | responds to voice or tap | alert, cooperative | mildly agitated, confused | very agitated, requires restraints | extremely agitated, danger to self or others |
| WBC                        | < 1.0 <sup>b</sup> | 1.0-2.9 <sup>b</sup>        | -                        | 3.0-14.9           | 15.0-19.9                 | 20.0-39.9                          | $\geq 40$                                    |

Temp: temperature (°C), HR: heart rate, RR: respiratory rate, SBP: systolic blood pressure (mmHg), WBC: white blood cell count ( $\times 10^9/L$ ). <sup>a</sup>Do not score if the patient is receiving a sedating medication or has a general medical condition affecting mental status (e.g. traumatic brain injury, stroke). <sup>b</sup>Do not score if the patient is receiving oncolytic therapy.



**Table 2:** Characteristics of enrolled patients.

| <b>Demographics</b>                                         | <b>All patients<br/>n=216</b> |
|-------------------------------------------------------------|-------------------------------|
| Age in years, mean (SD)                                     | 59.3 (15.2)                   |
| Male, n (%)                                                 | 116 (53.7)                    |
| Race, n (%)                                                 |                               |
| Caucasian (White)                                           | 191 (88.4)                    |
| African American                                            | 20 (9.3)                      |
| Asian                                                       | 1 (0.5)                       |
| Pacific Islander                                            | 0 (0)                         |
| Other                                                       | 3 (1.4)                       |
| BMI, median (25 <sup>th</sup> , 75 <sup>th</sup> )          | 29.3 (24.8, 35.8)             |
| Charlson comorbidity index, mean (SD)                       | 4.3 (3.0)                     |
| APACHE II score (24 hrs), mean (SD)                         | 18.0 (8.1)                    |
| Inter-facility hospital transfer, n (%)                     | 95 (44.0)                     |
| Hospital-acquired sepsis*, n (%)                            | 88 (40.7)                     |
| ICU LOS, median (25 <sup>th</sup> , 75 <sup>th</sup> )      | 7 (3.5, 18)                   |
| Hospital LOS, median (25 <sup>th</sup> , 75 <sup>th</sup> ) | 17 (8, 29)                    |
| Discharge disposition, n (%)                                |                               |
| “Good” disposition                                          | 117 (54.2)                    |
| Home                                                        | 38 (17.6)                     |
| Home healthcare services                                    | 69 (31.2)                     |
| Rehab                                                       | 10 (4.6)                      |
| “Poor” disposition                                          | 99 (45.8)                     |
| Long term acute care facility                               | 30 (13.9)                     |
| Skilled nursing facility                                    | 37 (17.1)                     |
| Another Hospital                                            | 9 (4.2)                       |
| Hospice                                                     | 7 (3.2)                       |
| Death                                                       | 16 (7.4)                      |

SD: standard deviation, BMI: body mass index, APACHE: Acute Physiology and Chronic Health Evaluation, ICU: intensive care unit, LOS: length of stay. \*Sepsis onset  $\geq 48$  hours after hospital admission.



**Table 3:** Indications for blood product transfusion.

| <b>Blood product</b>              | <b>Indications for transfusion</b>                                                                                                                                          |
|-----------------------------------|-----------------------------------------------------------------------------------------------------------------------------------------------------------------------------|
| Red blood cells                   | Hb <7 g/dL or HCT <21%<br>Hb <10 g/dL or HCT <30% and symptomatic cardiovascular disease<br>Acute blood loss >30% of total blood volume                                     |
| Plasma (minimum dose 10-20 mL/kg) | INR >1.7 and active bleeding or immediately prior to a procedure<br>Thrombotic thrombocytopenic purpura<br>Factor deficiency for which no specific concentrate is available |
| Cryoprecipitate                   | Fibrinogen <100 mg/dL<br>Factor XIII deficiency<br>Perioperative management                                                                                                 |

Hb: hemoglobin, HCT: hematocrit, INR: international normalized ratio.

## Figure legends

**Figure 1:** The persistent inflammation, immunosuppression, and catabolism syndrome (PICS), adapted from Rosenthal et al.<sup>6</sup> and Mira et al.<sup>47</sup> MOF: multiple organ failure, SIRS: systemic inflammatory response syndrome, CARS: compensatory anti-inflammatory response syndrome, LTAC: long-term acute care facility.

**Supplementary figure 1:** Protocol for daily spontaneous breathing trials.

1  
2  
3  
4  
5  
6  
7  
8  
9  
10  
11  
12  
13  
14  
15  
16  
17  
18  
19  
20  
21  
22  
23  
24  
25  
26  
27  
28  
29  
30  
31  
32  
33  
34  
35  
36  
37  
38  
39  
40  
41  
42  
43  
44  
45  
46  
47  
48  
49  
50  
51  
52  
53  
54  
55  
56  
57  
58  
59  
60

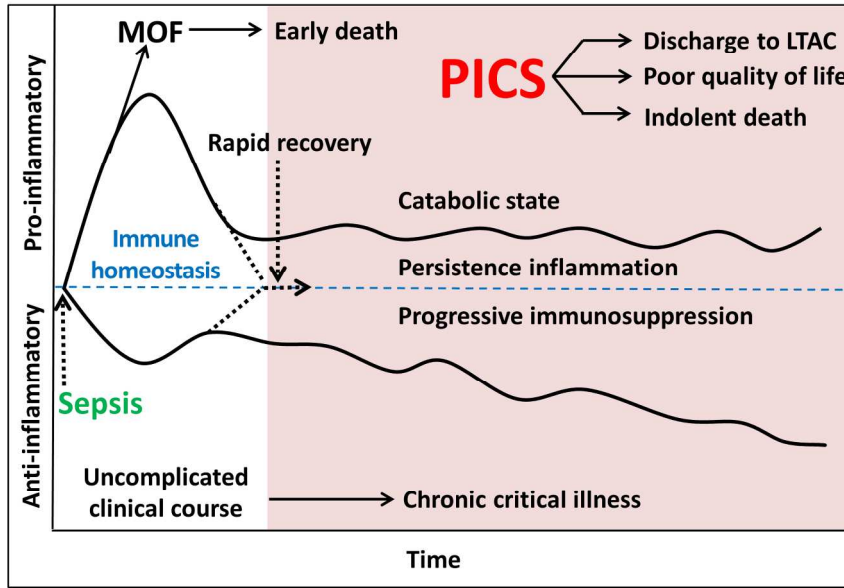

MOF –multiple organ failure; PICS – persistent inflammation, immune suppression, and catabolism syndrome; LTAC – long term acute care facility

Figure 1: The persistent inflammation, immunosuppression, and catabolism syndrome (PICS), adapted from Rosenthal et al.<sup>6</sup> and Mira et al.<sup>44</sup> MOF: multiple organ failure, SIRS: systemic inflammatory response syndrome, CARS: compensatory anti-inflammatory response syndrome, LTAC: long-term acute care facility.

254x338mm (300 x 300 DPI)

Supplementary table 1: Delirium protocol.

**Step 1: Non-pharmacological interventions for delirium prevention and treatment**

## General

- Perform daily sedation holidays, unless contraindicated
- Avoid over-treatment and under-treatment of pain

## Orientation

- Encourage communication
- Have familiar objects from the patient's home in the hospital room
- Frequently re-orient the patient to date, time, and caretakers
- Attempt consistency in staff
- Provide visual and auditory aids
- Allow television during the day with daily news or non-verbal music

## Environment

- Encourage early mobilization (e.g. ambulation, range of motion exercises, minimize use of immobilizing equipment, ensure timely removal of catheters, order physical therapy and occupational therapy consults)
- Optimize sleep hygiene
  - Minimize noise and interruption
  - Keep lights on and window shades up during the day
  - Keep lights off and window shades closed at night

## Clinical parameters

- Maintain euvolemia
- Maintain adequate systolic blood pressure
- Maintain adequate oxygen saturation
- Treat underlying metabolic derangements and infections

**Step 2: Patient assessment**

## Nursing responsibilities

- Assess delirium using Confusion Assessment Method for the Intensive Care Unit (CAM-ICU)<sup>45</sup> every nursing shift, during sedation holidays if applicable
- Document screening results in the electronic medical record
- Report delirium positive results to the physician or advanced practitioner
- Assess for other causes of neurological status changes (e.g. hypoxia, vasospasm, stroke, seizure, infection, hypoglycemia, myocardial

infarction, pulmonary embolism)

- Assess patient for extra-pyramidal symptoms (e.g. acute dystonia, akathisia, parkinsonism, tardive dyskinesia), drug-induced rigidity, and high fever at least twice daily (every nursing shift) and when there is a change in clinical status

Physician or advanced practitioner responsibilities

- Assess the patient for non-delirium causes of neurological status changes
- Order appropriate delirium intervention(s) if applicable (Step 3)

### Step 3: Interventions by CAM-ICU assessment result

Unable to assess delirium (Richmond Agitation Sedation Scale (RASS)<sup>46</sup> score -4 or -5)

- Lighten sedation, if applicable, to obtain goal level of sedation
- Continue non-pharmacological interventions for delirium prevention
- Continue daily sedation holidays, unless contraindicated

CAM-ICU delirium negative

- If applicable, continue sedation and analgesia protocols for treatment of anxiety and pain
- Continue non-pharmacological interventions for delirium prevention
- Continue twice daily delirium assessments

CAM-ICU delirium positive

All delirium positive patients

- Implement non-pharmacologic interventions for the prevention and treatment of delirium
- Assess patient for non-delirium causes of neurological status changes
- Ensure adequate pain control
- Discontinue or minimize use of potentially deliriogenic drugs
  - Avoid the use of benzodiazepines
  - Consider the use of propofol if sedation is required

-AND-

Tailored delirium treatment based on RASS score

- Delirium positive and RASS +2 to +4 [agitated]

- Assess pain
  - Pain: treat with analgesics and reassess for delirium
  - No pain: consider treatment with an antipsychotic agent (see next section)
- Provide adequate sedation for protection of the patient and staff
- Delirium positive and RASS 0 or +1 [awake and alert]
  - Ensure adequate pain control
  - Consider treatment with an antipsychotic agent (see next section)
- Delirium positive and RASS -1 to -3 [sedated]
  - Reassess sedation goal and consider adjustment of sedation regimen
  - Perform daily sedation holidays

## **Treatment of delirium with antipsychotic medications**

### General considerations

- For patients with alcohol withdrawal delirium (delirium tremens) or traumatic brain injury, use protocols specific for those disease processes
- For transplant patients, discuss with the transplant service before ordering medications
- For pregnant patients, carefully assess risks and benefits of medications and discuss with the Obstetrics and Gynecology service prior to ordering medications
- Use lower antipsychotic doses for elderly patients
- Prior to initiation of antipsychotics, obtain baseline QTc and monitor regularly thereafter
  - If QTc >490 mSec on bedside monitor, obtain 12-lead electrocardiogram
  - If QTc >500 mSec on 12-lead electrocardiogram
    - Alert physician or advanced practitioner
    - Hold all non-essential QTc prolonging medications and do not administer atypical antipsychotics
    - Repeat electrocardiogram in 6-12 hours
    - Consider supplemental magnesium administration
- Perform regular assessments for extra-pyramidal symptoms, drug-induced rigidity, and high fever
- Obtain liver function tests at baseline and at regular intervals according to the pharmacologic profile of the medication in use
- Consider consultation with the Psychiatry service if:

- Antipsychotic agents are ineffective
- The patient has a contraindication to antipsychotic use
- The patient has a baseline psychiatric disorder for which the patient is already receiving antipsychotics

#### Antipsychotic discontinuation

Once delirium has resolved, taper to the minimum effective dose over 3 to 5 days. Therapy should be discontinued approximately two weeks after discharge from the ICU or prior to discharge home to avoid the development of long-term adverse effects, including:

- Sedation/fatigue
- Weight gain
- Glucose intolerance
- Dyslipidemia
- Sudden cardiac death
- Increased mortality among elderly patients with dementia

Supplementary table 2: Nutrition protocol.

**Feeding initiation and advancement parameters**

- For intubated patients with NUTRIC<sup>47</sup> score =5 with severe malnutrition per clinical assessment, unless contraindicated (see below) enteral access should be obtained and tube feeds initiated within 48 hours of admission
- For non-intubated severely malnourished patients or patients with NUTRIC score =5 who remain NPO or on a clear liquid diet on ICU day 5, get enteral access and initiate feeds unless contraindicated (see below)
- After resuscitation is complete (as defined by the resuscitation protocol), start tube feeds at 20 mL/hour and if no moderate or severe intolerances exist, advance by 10 mL/hour every 4-6 hours until the targeted goal is reached
- If post-pyloric enteral access is unavailable after multiple attempts, gastric feeds via a nasogastric tube may be initiated with aspiration precautions and gastric residual volume checks every 4 hours, tube feeds should only be held for residuals >500 mL or other signs of intolerance (e.g. emesis, distension)
- Enteral feeds should be no greater than 10ml/hour for the following high vasopressor requirements:
  - Norepinephrine or Epinephrine >0.1mcg/kg/min
  - Phenylephrine >1mcg/kg/min
  - Dopamine >10mcg/kg/min
  - Multiple vasopressors

**Contraindications for tube feeds** (risk for non-occlusive bowel necrosis)

- Active shock resuscitation
- Mean arterial pressure <60 mmHg for >60 minutes
- Acute respiratory distress syndrome with prone position
- Moderate or severe distention for >48 hours on an elemental diet
- Ischemic heart disease requiring vasopressors
- Bladder pressure >20 mmHg
- Vasopressin use
- Paralytic use



|                                                                                                                                                                                                                                                                                                                                                                                                                                                                                                                                                                                                                                                                                                                                                                                                                                                                                                                                                                                                                                                                                                                             |                  |                           |
|-----------------------------------------------------------------------------------------------------------------------------------------------------------------------------------------------------------------------------------------------------------------------------------------------------------------------------------------------------------------------------------------------------------------------------------------------------------------------------------------------------------------------------------------------------------------------------------------------------------------------------------------------------------------------------------------------------------------------------------------------------------------------------------------------------------------------------------------------------------------------------------------------------------------------------------------------------------------------------------------------------------------------------------------------------------------------------------------------------------------------------|------------------|---------------------------|
| <b>Tube feed formula</b>                                                                                                                                                                                                                                                                                                                                                                                                                                                                                                                                                                                                                                                                                                                                                                                                                                                                                                                                                                                                                                                                                                    | <b>Kcal/mL</b>   | <b>Protein g/L</b>        |
| Immune enhancing                                                                                                                                                                                                                                                                                                                                                                                                                                                                                                                                                                                                                                                                                                                                                                                                                                                                                                                                                                                                                                                                                                            | 1.5              | 94                        |
| Polymeric                                                                                                                                                                                                                                                                                                                                                                                                                                                                                                                                                                                                                                                                                                                                                                                                                                                                                                                                                                                                                                                                                                                   | 1.5              | 63                        |
| Semi-elemental                                                                                                                                                                                                                                                                                                                                                                                                                                                                                                                                                                                                                                                                                                                                                                                                                                                                                                                                                                                                                                                                                                              | 1.2              | 75                        |
| <b>Additives</b>                                                                                                                                                                                                                                                                                                                                                                                                                                                                                                                                                                                                                                                                                                                                                                                                                                                                                                                                                                                                                                                                                                            | <b>Kcal/pack</b> | <b>Contents/pack</b>      |
| Juven®                                                                                                                                                                                                                                                                                                                                                                                                                                                                                                                                                                                                                                                                                                                                                                                                                                                                                                                                                                                                                                                                                                                      | 80               | 7g glutamine, 7g arginine |
| Benefiber®                                                                                                                                                                                                                                                                                                                                                                                                                                                                                                                                                                                                                                                                                                                                                                                                                                                                                                                                                                                                                                                                                                                  | 15               | 3g soluble fiber          |
| Protein liquid                                                                                                                                                                                                                                                                                                                                                                                                                                                                                                                                                                                                                                                                                                                                                                                                                                                                                                                                                                                                                                                                                                              | 60               | 15g protein               |
| <p><b>Indications for immune enhancing formula</b><br/>(administer for 10 days following surgery or trauma)</p> <ol style="list-style-type: none"> <li>Non-trauma patients <ul style="list-style-type: none"> <li>Moderately or severely malnourished patients undergoing major gastrointestinal surgery should receive immune enhancing formulas for 5-7 day preoperatively and 10 days postoperatively</li> </ul> </li> <li>Trauma patients <ul style="list-style-type: none"> <li>Major torso trauma <ul style="list-style-type: none"> <li>Combined flail chest/pulmonary contusion anticipated to require prolonged mechanical ventilation</li> <li>Thoracotomy with lung resection, aortic repair, or diaphragm repair</li> <li>Patients &gt;45 years old with 4 or more rib fractures or flail chest</li> </ul> </li> <li>Major abdominal trauma</li> <li>Two or more of the following: <ul style="list-style-type: none"> <li>&gt;6 unit transfusion requirement</li> <li>Major pelvic fracture (acetabular, vertical shear, open book)</li> <li>Two or more long bone fractures</li> </ul> </li> </ul> </li> </ol> |                  |                           |
| <p><b>Indications for polymeric formula</b></p> <ul style="list-style-type: none"> <li>Patients who do not meet the criteria for immune enhancing formula but have normal digestive and absorptive capacity of the gastrointestinal tract</li> <li>Patients who have received 10 days of immune enhancing formula administration</li> </ul>                                                                                                                                                                                                                                                                                                                                                                                                                                                                                                                                                                                                                                                                                                                                                                                 |                  |                           |

**Indications for semi-elemental formula**

- Pancreatitis
- Intolerance to the first formula used
- Short gut syndrome
- High output distal colonic or ileal fistula
- Persistent, severe diarrhea for >48 hours on polymeric formula

**Indications for Juven®\***

- After intraoperative ischemia/reperfusion injury (systolic blood pressure <90 mmHg for >1 hour or serum lactate >4 mmol/L)
- After cardiac arrest or burn injury
- Thoracoabdominal radiation and/or chemotherapy
- Major torso trauma with Injury Severity Score >17
- Post-operative patients at high risk for poor wound healing
- Prolonged mechanical ventilation

\*Do not use Juven® if the patient is status post solid organ transplantation

**Indications for total parenteral nutrition**

- Massive small bowel resection refractory to enteral feeds
- High output fistula after failure of elemental diet
- Unable to meet >60% caloric and protein goals enterally by ICU day 7
- Unable to meet >85% caloric and protein goals enterally by ICU day 10
- High risk for non-occlusive bowel necrosis after ICU day 7
  
- TPN may be considered earlier in patients with severe malnutrition or NUTRIC =5 and contraindications to enteral nutrition feeding
  
- Lipids should not be given to critically ill patients who require parenteral nutrition during their first week of hospitalization

**Weekly indirect calorimetry assessments**

- For mechanically ventilated patients with FiO<sub>2</sub> <60%, PEEP <10 mmHg, no leaky chest tubes or leaky endotracheal tubes, bronchopleural fistula, or renal replacement therapy within 12 hours and are receiving enteral or parenteral nutrition at goal rate
  
- Measure 24-hour urine urea nitrogen weekly for patients who are not receiving renal replacement therapy or diuresis

1  
2  
3  
4  
5  
6  
7  
8  
9  
10  
11  
12  
13  
14  
15  
16  
17  
18  
19  
20  
21  
22  
23  
24  
25  
26  
27  
28  
29  
30  
31  
32  
33  
34  
35  
36  
37  
38  
39  
40  
41  
42  
43  
44  
45  
46  
47  
48  
49  
50  
51  
52  
53  
54  
55  
56  
57  
58  
59  
60

NPO: nothing by mouth, ICU: intensive care unit, FiO2: fraction of inspired oxygen, PEEP: positive end-expiratory pressure

For peer review only

# Daily Wake Up Plus BEST (Breathing to Extubate Spontaneous Trial)

(To occur for endotracheally intubated patients: 4E/4W between 0330-0430; MICU between 0800-0930)

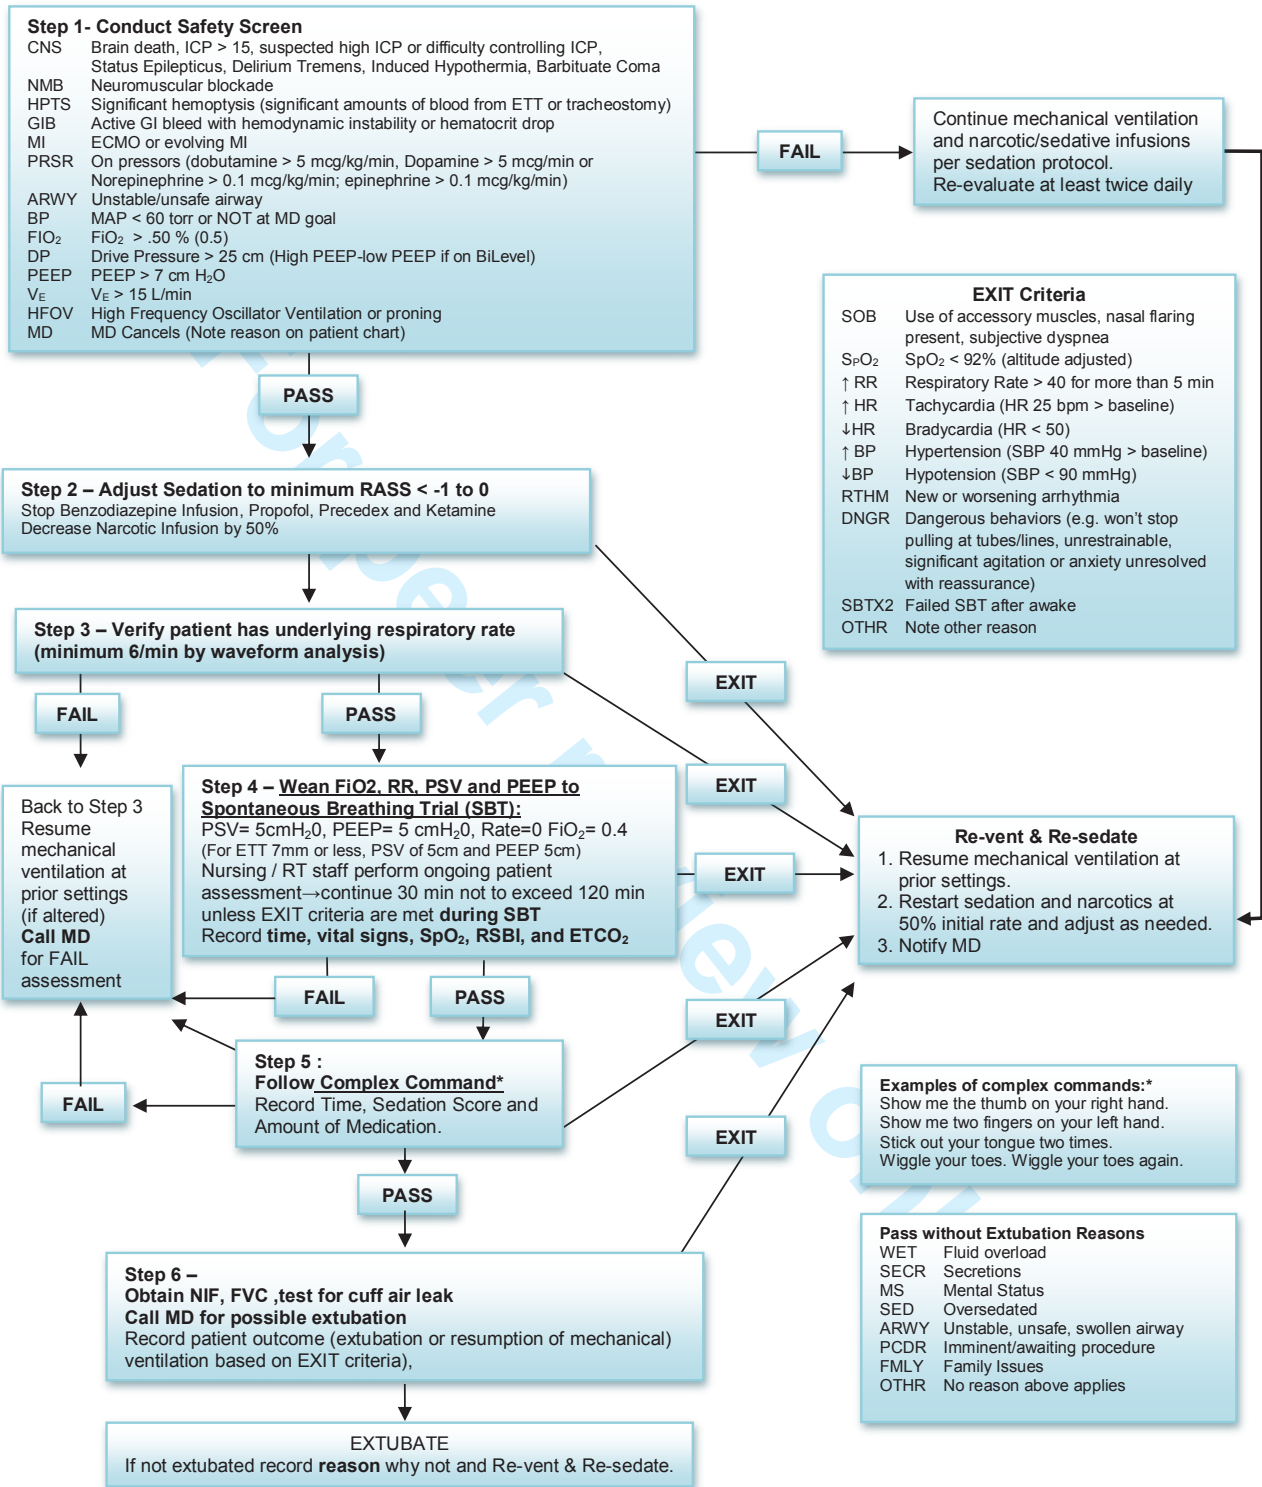

Do not file in Medical Record after Discharge

Patient Name:

Patient Identification #:

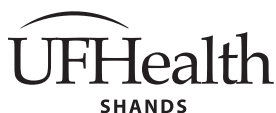

Supplement: bmjopen-2016-015136.draft_revisions.pdf [file bmjopen-2016-015136.draft_revisions.pdf]
