# Supplementary material for: Sepsis and Critical Illness Research Center investigators: protocols and standard operating procedures for a prospective cohort study of sepsis in critically ill surgical patients
Source: PubMed Central journal article supplement — BMJ Open. 2017 Aug 1;7(7):e015136. doi: 10.1136/bmjopen-2016-015136 (PMC5642775; doi:10.1136/bmjopen-2016-015136), 2017-08-01
Supplement: bmjopen-2016-015136supp001.pdf [file bmjopen-2016-015136supp001.pdf]

# Daily Wake Up Plus BEST

## (Breathing to Extubate Spontaneous Trial)

(To occur for endotracheally intubated patients: 4E/4W between 0330-0430; MICU between 0800-0930)

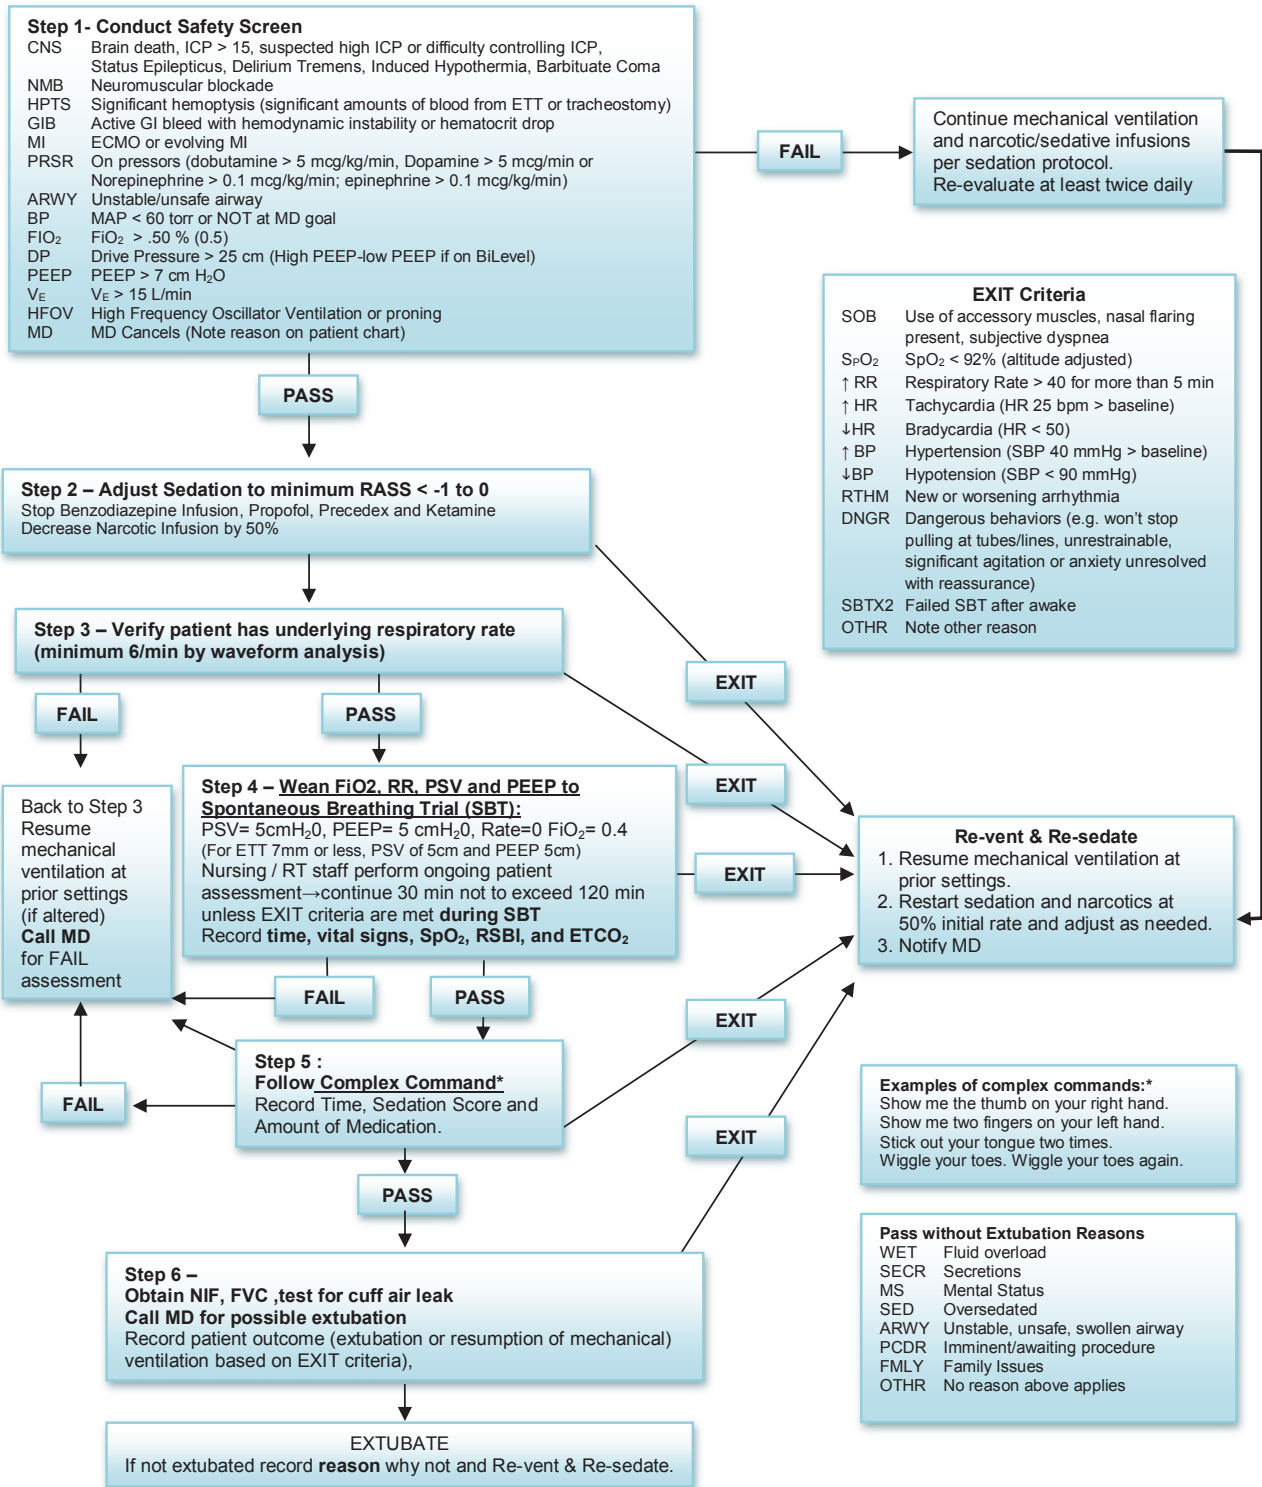

**Do not file in Medical Record after Discharge**

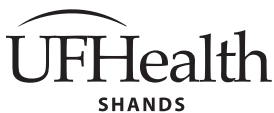

Patient Name: \_\_\_\_\_ Patient Identification #: \_\_\_\_\_
