# Supplementary material for: Sepsis and Critical Illness Research Center investigators: protocols and standard operating procedures for a prospective cohort study of sepsis in critically ill surgical patients
Source: PubMed Central journal article supplement — BMJ Open. 2017 Aug 1;7(7):e015136. doi: 10.1136/bmjopen-2016-015136 (PMC5642775; doi:10.1136/bmjopen-2016-015136), 2017-08-01
Supplement: bmjopen-2016-015136supp003.pdf [file bmjopen-2016-015136supp003.pdf]

**Supplementary table 2: Nutrition protocol.**

**Feeding initiation and advancement parameters**

- For intubated patients with NUTRIC<sup>47</sup> score =5 with severe malnutrition per clinical assessment, unless contraindicated (see below) enteral access should be obtained and tube feeds initiated within 48 hours of admission
- For non-intubated severely malnourished patients or patients with NUTRIC score =5 who remain NPO or on a clear liquid diet on ICU day 5, get enteral access and initiate feeds unless contraindicated (see below)
- After resuscitation is complete (as defined by the resuscitation protocol), start tube feeds at 20 mL/hour and if no moderate or severe intolerances exist, advance by 10 mL/hour every 4-6 hours until the targeted goal is reached
- If post-pyloric enteral access is unavailable after multiple attempts, gastric feeds via a nasogastric tube may be initiated with aspiration precautions and gastric residual volume checks every 4 hours, tube feeds should only be held for residuals >500 mL or other signs of intolerance (e.g. emesis, distension)
- Enteral feeds should be no greater than 10ml/hour for the following high vasopressor requirements:
  - Norepinephrine or Epinephrine >0.1mcg/kg/min
  - Phenylephrine >1mcg/kg/min
  - Dopamine >10mcg/kg/min
  - Multiple vasopressors

**Contraindications for tube feeds (risk for non-occlusive bowel necrosis)**

- Active shock resuscitation
- Mean arterial pressure <60 mmHg for >60 minutes
- Acute respiratory distress syndrome with prone position
- Moderate or severe distention for >48 hours on an elemental diet
- Ischemic heart disease requiring vasopressors
- Bladder pressure >20 mmHg
- Vasopressin use
- Paralytic use

| <b>Tube feed formula</b> | <b>Kcal/mL</b> | <b>Protein g/L</b> |
|--------------------------|----------------|--------------------|
| Immune enhancing         | 1.5            | 94                 |
| Polymeric                | 1.5            | 63                 |
| Semi-elemental           | 1.2            | 75                 |

  

| <b>Additives</b> | <b>Kcal/pack</b> | <b>Contents/pack</b>      |
|------------------|------------------|---------------------------|
| Juven®           | 80               | 7g glutamine, 7g arginine |
| Benefiber®       | 15               | 3g soluble fiber          |
| Protein liquid   | 60               | 15g protein               |

  

**Indications for immune enhancing formula**  
(administer for 10 days following surgery or trauma)

1. Non-trauma patients
  - Moderately or severely malnourished patients undergoing major gastrointestinal surgery should receive immune enhancing formulas for 5-7 day preoperatively and 10 days postoperatively
  
2. Trauma patients
  - Major torso trauma
    - Combined flail chest/pulmonary contusion anticipated to require prolonged mechanical ventilation
    - Thoracotomy with lung resection, aortic repair, or diaphragm repair
    - Patients >45 years old with 4 or more rib fractures or flail chest
  - Major abdominal trauma
  - Two or more of the following:
    - >6 unit transfusion requirement
    - Major pelvic fracture (acetabular, vertical shear, open book)
    - Two or more long bone fractures

  

**Indications for polymeric formula**

- Patients who do not meet the criteria for immune enhancing formula but have normal digestive and absorptive capacity of the gastrointestinal tract
- Patients who have received 10 days of immune enhancing formula administration

**Indications for semi-elemental formula**

- Pancreatitis
- Intolerance to the first formula used
- Short gut syndrome
- High output distal colonic or ileal fistula
- Persistent, severe diarrhea for >48 hours on polymeric formula

**Indications for Juven®\***

- After intraoperative ischemia/reperfusion injury (systolic blood pressure <90 mmHg for >1 hour or serum lactate >4 mmol/L)
- After cardiac arrest or burn injury
- Thoracoabdominal radiation and/or chemotherapy
- Major torso trauma with Injury Severity Score >17
- Post-operative patients at high risk for poor wound healing
- Prolonged mechanical ventilation

\*Do not use Juven® if the patient is status post solid organ transplantation

**Indications for total parenteral nutrition**

- Massive small bowel resection refractory to enteral feeds
- High output fistula after failure of elemental diet
- Unable to meet >60% caloric and protein goals enterally by ICU day 7
- Unable to meet >85% caloric and protein goals enterally by ICU day 10
- High risk for non-occlusive bowel necrosis after ICU day 7
  
- TPN may be considered earlier in patients with severe malnutrition or NUTRIC =5 and contraindications to enteral nutrition feeding
  
- Lipids should not be given to critically ill patients who require parenteral nutrition during their first week of hospitalization

**Weekly indirect calorimetry assessments**

- For mechanically ventilated patients with FiO<sub>2</sub> <60%, PEEP <10 mmHg, no leaky chest tubes or leaky endotracheal tubes, bronchopleural fistula, or renal replacement therapy within 12 hours and are receiving enteral or parenteral nutrition at goal rate
  
- Measure 24-hour urine urea nitrogen weekly for patients who are not receiving renal replacement therapy or diuresis

NPO: nothing by mouth, ICU: intensive care unit, FiO<sub>2</sub>: fraction of inspired oxygen, PEEP: positive end-expiratory pressure
